# Supplementary material
Source: PubMed Central journal article supplement (PMC8405616)
Supplement: 41416_2021_1415_MOESM1_ESM.pdf [file 41416_2021_1415_MOESM1_ESM.pdf]

## Appendix 16.1.3 List of Independent Ethics Committees (IECs) or Institutional Review Boards (IRBs) and representative written information for patients and sample consent forms

### 1 List of Independent Ethics Committees (IECs) or Institutional Review Boards (IRBs)

**Table 1-1 List of Independent Ethics Committees (IEC) or Institutional Review Boards (IRB) by study center**

| Center No. | Ethics Committee or Institutional Review Board                                 | Department / Organization | Address Country                                         |
|------------|--------------------------------------------------------------------------------|---------------------------|---------------------------------------------------------|
| 1001       | Bellberry Human Research Ethics Committee                                      |                           | Eastwood South 5063 Australia                           |
| 1002       | Bellberry Human Research Ethics Committee                                      |                           | Eastwood South 5063 Australia                           |
| 1003       | Bellberry Human Research Ethics Committee                                      |                           | Eastwood South 5063 Australia                           |
| 1300       | Sheba EC                                                                       | Research and development  | Ramat Gan 42950 Israel                                  |
| 1301       | TASMC EC                                                                       | Research and development  | Tel-Aviv Sourasky Medical Center (Ichilov) 42950 Israel |
| 1302       | Rabin EC                                                                       | Research and development  | Petach Tikva 42950 Israel                               |
| 1404       | Asan Medical Center Institutional Review Board                                 |                           | Seoul 138-736 Korea, Republic of                        |
| 1405       | Severance Hospital, Yonsei University Health System Institutional Review Board |                           | Seoul 120-752 Korea, Republic of                        |
| 1406       | National Cancer Center Institutional Review Board                              |                           | Goyang Gyeonggi-do 410-769 Korea, Republic of           |

| <b>Center No.</b> | <b>Ethics Committee or Institutional Review Board</b>                  | <b>Department / Organization</b> | <b>Address Country</b>                          |
|-------------------|------------------------------------------------------------------------|----------------------------------|-------------------------------------------------|
| 1407              | Seoul National University Bundang Hospital Institutional Review Board  |                                  | Seongnam Gyeonggi-do 463-707 Korea, Republic of |
| 1408              | Seoul National University Hospital Institutional Review Board          |                                  | Seoul 110 744 Korea, Republic of                |
| 1500              | Hotel Dieu De France Ethics Committee                                  | Biomedical                       | Beirut 16-6830 Lebanon                          |
| 1501              | Hammoud Hospital University Medical Center IRB                         | Biomedical                       | Saida 652,Lebanon                               |
| 1502              | American University of Beirut Medical Center IRB                       | Biomedical                       | Beirut 11-0236, Lebanon                         |
| 1503              | Bellevue Medical Center IRB                                            | Biomedical                       | Beirut 295, Lebanon                             |
| 1600              | Ethics Committee at Arkhangelsk Clinical Oncology Dispensary           |                                  | Arkhangelsk 163045 Russia                       |
| 1601              | Local Ethics Committee at Privolzhskiy Federal Medical Research Center |                                  | Nizhniy Novgorod 603155 Russia                  |
| 1602              | Ethics Committee at Ryazan Regional Clinical Oncological Dispensary    |                                  | Ryazan 390011 Russia                            |
| 1700              | SingHealth Centralized IRB                                             |                                  | 150168 Singapore                                |
| 1800              | Pharma-Ethics Research Ethics Committee                                |                                  | Irene 0157 South Africa                         |
| 1861              | Research Ethics Committee, National Taiwan University Hospital         |                                  | Taipei City 10002 Taiwan (R.O.C.)               |
| 1862              | Chang Gung Medical Foundation Institutional Review Board               |                                  | Taoyuan County 333 Taiwan                       |

| <b>Center No.</b> | <b>Ethics Committee or Institutional Review Board</b>                               | <b>Department / Organization</b>                                | <b>Address Country</b>                 |
|-------------------|-------------------------------------------------------------------------------------|-----------------------------------------------------------------|----------------------------------------|
| 1863              | Institutional Review Board, Taipei Veterans General Hospital                        |                                                                 | Taipei 112<br>Taiwan                   |
| 1864              | Office of Human Research, TMU                                                       |                                                                 | Taipei City 110<br>Taiwan<br>(R.O.C.)  |
| 1866              | Institutional Review Board, Kaohsiung Medical University Chang-Ho Memorial Hospital |                                                                 | Kaohsiung NA 807<br>Taiwan             |
| 1901              | Baskent University Clinical Trials Ethics Committee                                 | Baskent University Medical Faculty                              | Ankara Bahcelievler 06490<br>Turkey    |
| 1902              | Baskent University Clinical Trials Ethics Committee                                 | Baskent University Medical Faculty                              | Ankara Bahcelievler 06490<br>Turkey    |
| 1903              | Baskent University Clinical Trials Ethics Committee                                 | Baskent University Medical Faculty                              | Ankara Bahcelievler 06490<br>Turkey    |
| 1904              | Baskent University Clinical Trials Ethics Committee                                 | Baskent University Medical Faculty                              | Ankara Bahcelievler 06490<br>Turkey    |
| 1905              | Baskent University Clinical Trials Ethics Committee                                 | Baskent University Medical Faculty                              | Ankara Bahcelievler 06490<br>Turkey    |
| 1962              | Institution Review Board                                                            | Research Affairs, Faculty of Medicine, Chulalongkorn University | Bangkok 10330<br>Thailand              |
| 2500              | Ethikkommission der Stadt Wien                                                      |                                                                 | Wien 1030<br>Austria                   |
| 2502              | Ethikkommission für das Bundesland Salzburg                                         |                                                                 | Salzburg 5010<br>Austria               |
| 2503              | Ethikkommission der Medizinischen Universität Wien                                  |                                                                 | Wien 1090<br>Austria                   |
| 2600              | AZ niklaas Ethische Commissie                                                       |                                                                 | Sint-Niklaas Antwerpen 9100<br>Belgium |

| <b>Center No.</b> | <b>Ethics Committee or Institutional Review Board</b>  | <b>Department / Organization</b> | <b>Address Country</b>                         |
|-------------------|--------------------------------------------------------|----------------------------------|------------------------------------------------|
| 2601              | St. Elisabeth Comité d'Ethique                         |                                  | Namur 5000<br>Belgium                          |
| 2602              | Virga Jesse Ethische Toetsingscommissie                |                                  | Hasselt<br>Limburg 3500<br>Belgium             |
| 2603              | St. Augustinus Ethische Commissie                      |                                  | Wilrijk<br>Antwerpen<br>2610<br>Belgium        |
| 2604              | UZ Leuven Ethische Commissie                           |                                  | Leuven,<br>Vlaams-<br>Brabant 3000,<br>Belgium |
| 2700              | Eticka komise FN Olomouc                               |                                  | Olomouc 775<br>20<br>Czech<br>Republic         |
| 2701              | Eticka komise Masarykova onkologickeho ustavu          |                                  | Brno 656 53<br>Czech<br>Republic               |
| 2703              | Multicentricka eticka komice Krajske nemocnice Liberec |                                  | Liberec 460<br>63<br>Czech<br>Republic         |
| 2706              | Eticka komise FN Brno                                  |                                  | Brno 625 00<br>Czech<br>Republic               |
| 2800              | De Videnskabsetiske Komitéer for Region Syddanmark     |                                  | Vejle - 7100<br>Denmark                        |
| 2801              | De Videnskabsetiske Komitéer for Region Syddanmark     |                                  | Vejle - 7100<br>Denmark                        |
| 2802              | De Videnskabsetiske Komitéer for Region Syddanmark     |                                  | Vejle - 7100<br>Denmark                        |
| 2805              | De Videnskabsetiske Komitéer for Region Syddanmark     |                                  | Vejle - 7100<br>Denmark                        |
| 2900              | Varsinais-Suomen sairaanhoitopiiri                     | Eettinen toimikunta              | Turku 20521<br>Finland                         |
| 2903              | Varsinais-Suomen sairaanhoitopiiri                     | Eettinen toimikunta              | Turku 20521<br>Finland                         |
| 3000              | CPP Ouest IV                                           | Maison De La Recherche En sante  | Nantes 44000<br>France                         |
| 3001              | CPP Ouest IV                                           | Maison De La Recherche En sante  | Nantes 44000                                   |

| <b>Center No.</b> | <b>Ethics Committee or Institutional Review Board</b>                              | <b>Department / Organization</b> | <b>Address Country</b>                                 |
|-------------------|------------------------------------------------------------------------------------|----------------------------------|--------------------------------------------------------|
|                   |                                                                                    |                                  | France                                                 |
| 3002              | CPP Ouest IV                                                                       | Maison De La Recherche En sante  | Nantes 44000<br>France                                 |
| 3003              | CPP Ouest IV                                                                       | Maison De La Recherche En sante  | Nantes 44000<br>France                                 |
| 3004              | CPP Ouest IV                                                                       | Maison De La Recherche En sante  | Nantes 44000<br>France                                 |
| 3006              | CPP Ouest IV                                                                       | Maison De La Recherche En sante  | Nantes 44000<br>France                                 |
| 3007              | CPP Ouest IV                                                                       | Maison De La Recherche En sante  | Nantes 44000<br>France                                 |
| 3008              | CPP Ouest IV                                                                       | Maison De La Recherche En sante  | Nantes 44000<br>France                                 |
| 3009              | CPP Ouest IV                                                                       | Maison De La Recherche En sante  | Nantes 44000<br>France                                 |
| 3011              | CPP Ouest IV                                                                       | Maison De La Recherche En sante  | Nantes 44000<br>France                                 |
| 3012              | CPP Ouest IV                                                                       | Maison De La Recherche En sante  | Nantes 44000<br>France                                 |
| 3014              | CPP Ouest IV                                                                       | Maison De La Recherche En sante  | Nantes 44000<br>France                                 |
| 3100              | Universität Ulm<br>Ethik-Kommission                                                |                                  | Ulm Baden-<br>Württemberg<br>89081<br>Germany          |
| 3101              | Ethik-Kommission der<br>Bayerischen<br>Landesärztekammer                           |                                  | München<br>Bayern<br>81677<br>Germany                  |
| 3103              | Ethik-Kommission bei<br>der<br>Landesärztekammer<br>Baden-Württemberg              |                                  | Stuttgart<br>Baden-<br>Württemberg<br>70597<br>Germany |
| 3105              | Friedrich-Alexander-<br>Universität Erlangen-<br>Nürnberg<br>Medizinische Fakultät |                                  | Erlangen<br>Bayern<br>91054<br>Germany                 |

| <b>Center No.</b> | <b>Ethics Committee or Institutional Review Board</b>                                                                 | <b>Department / Organization</b> | <b>Address Country</b>                                |
|-------------------|-----------------------------------------------------------------------------------------------------------------------|----------------------------------|-------------------------------------------------------|
|                   | Ethik-Kommission                                                                                                      |                                  |                                                       |
| 3106              | Ethik-Kommission der Medizinischen Fakultät der Heinrich-Heine-Universität                                            |                                  | Düsseldorf<br>Nordrhein-Westfalen<br>40225<br>Germany |
| 3107              | Ethik-Kommission der Bayerischen Landesärztekammer                                                                    |                                  | München<br>Bayern<br>81677<br>Germany                 |
| 3109              | Landesamt für Gesundheit und Soziales<br>Ethik-Kommission des Landes                                                  |                                  | Berlin Berlin<br>10707<br>Germany                     |
| 3110              | Ethik-Kommission an der Medizinischen Fakultät der Eberhard-Karls-Universität und am Universitätsklinikum             |                                  | Tübingen<br>Baden-Württemberg<br>72074<br>Germany     |
| 3112              | Landesärztekammer Hessen<br>Ethik-Kommission                                                                          |                                  | Frankfurt am Main<br>Hessen<br>60488<br>Germany       |
| 3113              | Ethikkommission der Ärztekammer Westfalen-Lippe und der Medizinischen Fakultät der Westfälischen Wilhelms-Universität |                                  | Münster<br>Nordrhein-Westfalen<br>48147<br>Germany    |
| 3114              | Landesamt für Gesundheit und Soziales<br>Ethik-Kommission des Landes                                                  |                                  | Berlin Berlin<br>10707<br>Germany                     |
| 3115              | Ethikkommission der Ärztekammer Westfalen-Lippe und der Medizinischen Fakultät der Westfälischen Wilhelms-Universität |                                  | Münster<br>Nordrhein-Westfalen<br>48147<br>Germany    |

| <b>Center No.</b> | <b>Ethics Committee or Institutional Review Board</b>                                                                                 | <b>Department / Organization</b> | <b>Address Country</b>                                    |
|-------------------|---------------------------------------------------------------------------------------------------------------------------------------|----------------------------------|-----------------------------------------------------------|
| 3116              | Ärztammer<br>Nordrhein<br>Ethik-Kommission                                                                                            |                                  | Düsseldorf<br>Nordrhein-<br>Westfalen<br>40474<br>Germany |
| 3117              | Ärztammer<br>Nordrhein<br>Ethik-Kommission                                                                                            |                                  | Düsseldorf<br>Nordrhein-<br>Westfalen<br>40474<br>Germany |
| 3118              | Ethik-Kommission der<br>Medizinischen Fakultät<br>Heidelberg                                                                          |                                  | Heidelberg<br>Baden-<br>Württemberg<br>69115<br>Germany   |
| 3119              | Ethik-Kommission bei<br>der<br>Landesärztkammer<br>Baden-Württemberg                                                                  |                                  | Stuttgart<br>Baden-<br>Württemberg<br>70597<br>Germany    |
| 3120              | Ärztammer<br>Nordrhein<br>Ethik-Kommission                                                                                            |                                  | Düsseldorf<br>Nordrhein-<br>Westfalen<br>40474<br>Germany |
| 3121              | Ethikkommission der<br>Ärztammer<br>Westfalen-Lippe und<br>der Medizinischen<br>Fakultät der<br>Westfälischen<br>Wilhelms-Universität |                                  | Münster<br>Nordrhein-<br>Westfalen<br>48147<br>Germany    |
| 3123              | Ärztammer<br>Niedersachsen<br>Ethik-Kommission                                                                                        |                                  | Hannover<br>Niedersachsen<br>30175<br>Germany             |
| 3126              | Ethik-Kommission der<br>Bayerischen<br>Landesärztkammer                                                                               |                                  | München<br>Bayern<br>81677<br>Germany                     |
| 3201              | Intezmenyi Human<br>Kutatasetikai Bizottsag                                                                                           |                                  | Gyula H-5700<br>Hungary                                   |
| 3202              | ETT Regionalis<br>Kutatasetikai<br>Bizottsaga                                                                                         |                                  | Gyor H-9023<br>Hungary                                    |
| 3205              | Regionalis es<br>Intezmenyi<br>Kutatasetikai<br>Bizottsaga                                                                            |                                  | Debrecen H-<br>4012<br>Hungary                            |

| <b>Center No.</b> | <b>Ethics Committee or Institutional Review Board</b>                                         | <b>Department / Organization</b>                                          | <b>Address Country</b>                 |
|-------------------|-----------------------------------------------------------------------------------------------|---------------------------------------------------------------------------|----------------------------------------|
| 3207              | Intezeti Etikai Bizottsag                                                                     |                                                                           | Budapest H-1134 Hungary                |
| 3300              | Comitato Per La Sperimentazione Clinica Dei Medicinali Area Vasta Nord Ovest                  | Azienda Ospedaliero Universitaria Pisana                                  | Pisa 56126 Italy                       |
| 3301              | Comitato Etico Dell'irccs Di Candiolo                                                         |                                                                           | Candiolo Torino 10060 Italy            |
| 3302              | Comitato Etico Dell'Azidenda Osperdaliera Bianchi-Melacrino – Morelli Di                      |                                                                           | Reggio Di Calabria 89100 Italy         |
| 3303              | Comitato Etico Delle Aziende Sanitarie Dell'umbria                                            | Segreteria ScientificoAmministrativa Del Ceas Umbria                      | Ellera Di Corciano Perugia 06073 Italy |
| 3304              | Comitato Etico Per La Sperimentazione Clinica Dell'irccs Istituto Oncologico Veneto Di Padova |                                                                           | Padova 35128 Italy                     |
| 3308              | Comitato Etico Della Provincia Di Brescia                                                     | AO Spedali Civili                                                         | Brescia 25123 Italy                    |
| 3314              | Comitato Etico Regione Liguria                                                                | IRCCS, Aou San Martino – IST istituto Nazionale Per La Ricerca Sul Cancro | Genova 16132 Italy                     |
| 3315              | Comitato Etico Della Fondazione IRCCS Istituto Nazionale Dei Tumori Di Milano                 |                                                                           | Milano 20133 Italy                     |
| 3316              | Comitato Etico Indipendente Dell'irccs centro Di Riferimento Oncologico Di Aviano             |                                                                           | Aviano Pordenone 33081 Italy           |
| 3317              | Comitato Etico Lazio 1                                                                        | Azienda Osperdaliera San Camillo – C. Forlanini Di Roma                   | Roma 00152 Italy                       |



| <b>Center No.</b> | <b>Ethics Committee or Institutional Review Board</b>                                    | <b>Department / Organization</b> | <b>Address Country</b>         |
|-------------------|------------------------------------------------------------------------------------------|----------------------------------|--------------------------------|
| 3319              | Comitato Etico Interaziendale Della Provinci                                             | AOU Policlinico G. Martino       | Messina, 98124 Italy           |
| 3320              | Comitato Etico Interaziendale Della Provinci                                             | AOU Policlinico G. Martino       | Messina, 98124 Italy           |
| 3322              | Comitato Etico Dell'ircs Istituto Nazionale Tumori Fondazione Pascale Di Napoli          |                                  | Napoli 80131 Italy             |
| 3323              | Azienda Ospedaliera Universitaria Ospedali Riuniti Umberto I-lancisi-GM Salesi Di Ancona |                                  | Ancona 60126 Italy             |
| 3324              | Comitato Etico Dell'universita Cattolica Del S. Cuore-Policlinico Gemelli, Roma Lazio    |                                  | Roma 00168 Italy               |
| 3325              | Comitato Etico Delle Provincie Di Lecco, Como E Sondrio                                  | AO di Lecco                      | Lecco 23900 Italy              |
| 3400              | PTC AvL                                                                                  |                                  | Amsterdam 1066 CX Netherlands  |
| 3401              | Maastricht UMC+                                                                          |                                  | Maastricht 6202 AZ Netherlands |
| 3403              | LUMC                                                                                     | Kamer H0-50/47                   | Leiden 2333 ZA Netherlands     |
| 3406              | Atrium Medisch Centrum Parkstad                                                          | Gebouw Leerhuis                  | Heerlen 6419 PC Netherlands    |
| 3409              | Nico Bolkensteinlaan                                                                     |                                  | Deventer 7416 SE Netherlands   |
| 3411              | Martini Ziekenhuis, RvB                                                                  |                                  | Groningen 9700 RM Netherlands  |

| <b>Center No.</b> | <b>Ethics Committee or Institutional Review Board</b>                | <b>Department / Organization</b>                                         | <b>Address Country</b>                      |
|-------------------|----------------------------------------------------------------------|--------------------------------------------------------------------------|---------------------------------------------|
| 3414              | METC Isala                                                           | Gebouw M (Mondriaan), kamer 0.25                                         | Zwolle 8000 GK<br>Netherlands               |
| 3416              | Tweesteden ziekenhuis                                                | Afd. TCWO                                                                | Tilburg 5042 AD<br>Netherlands              |
| 3417              | Universitair Medisch Centrum Groningen<br>Medisch Ethische Commissie |                                                                          | Groningen 9713 GZ<br>Netherlands            |
| 3423              | Foreest Medical School                                               |                                                                          | Alkmaar 1815 GM<br>Netherlands              |
| 3500              | Regional Committee for Medical and Health Research Ethics            | REC South East - Secretariat                                             | OSLO<br>318 NORWAY                          |
| 3501              | Regional Committee for Medical and Health Research Ethics            | REC South East - Secretariat                                             | OSLO<br>318 NORWAY                          |
| 3700              | Comité Ético Investigación Clínica de Galicia                        | C/ San Lázaro, s/n                                                       | Santiago de Compostela A Coruña 15703 Spain |
| 3701              | ENSAYOS CLINICOS                                                     | Edificio de Laboratorio                                                  | Sevilla 41013 Spain                         |
| 3702              | Hospital Regional Universitario de Málaga                            | EECC - Pabellón A - Planta 7                                             | Málaga Andalucía 29010 Spain                |
| 3703              | Hospital Clínico San Carlos                                          | CEIC - Coordinación de Ensayos - 4º Planta Ala Norte                     | Madrid 28040 Spain                          |
| 3704              | Hospital Universitario La Paz                                        | Secretaría Técnica - Planta 8ª                                           | Madrid 28046 Spain                          |
| 3705              | CEIC Hospital Vall d'Hebrón                                          | Paseo de la Vall d'Hebron, n.119-129 Edificio Materno-Infantil planta 13 | Barcelona 08035 Spain                       |
| 3706              | Instituto de Investigación del H. 12 de Octubre                      | Centro de Actividades Ambulatorias - 6ª Planta - Bloque D                | Madrid 28041 SPAIN                          |
| 3707              | CEIC FUNDACIÓ UNIÓ CATALANA D'HOSPITALS                              | C/ Bruc, 72 - 1ª Planta                                                  | Barcelona 08009 Spain                       |
| 3708              | CEIC Comité de Ética de Investigación                                | Edificio Unitat de Recerca                                               | L'Hospitalet                                |

| <b>Center No.</b> | <b>Ethics Committee or Institutional Review Board</b>            | <b>Department / Organization</b> | <b>Address Country</b>                                |
|-------------------|------------------------------------------------------------------|----------------------------------|-------------------------------------------------------|
|                   | Clínica Hospital Universitari de Bellvitge                       | Feixa Llarga, s/n                | De Llobregat<br>Barcelona<br>08907<br>Spain           |
| 3709              | Comité Ético Instituto Valenciano de Oncología                   |                                  | Valencia<br>46009<br>Spain                            |
| 3710              | Fundación de Investigación Biomédica H. Gregorio Marañón         | Pabellón de Gobierno             | Madrid 28007<br>Spain                                 |
| 3711              | CEIC Hospital Universitario de Canarias                          |                                  | La Laguna<br>Santa Cruz de Tenerife<br>38320<br>Spain |
| 3960              | Clinical Research Ethics Committee of the Cork Teaching Hospital |                                  | Cork T12 YN60<br>Ireland                              |
| 3961              | Clinical Research Ethics Committee of the Cork Teaching Hospital |                                  | Cork T12 YN60<br>Ireland                              |
| 6001              | Ontario Cancer Research Ethics Board                             |                                  | Toronto<br>Ontario M5G<br>0A3<br>Canada               |
| 6002              | Ontario Cancer Research Ethics Board                             |                                  | Toronto<br>Ontario M5G<br>0A3<br>Canada               |
| 6003              | Ontario Cancer Research Ethics Board (OCREB)                     |                                  | Toronto<br>Ontario M5G<br>DA3<br>Canada               |
| 6004              | Fraser Health Research Ethics Board                              | Evaluation and Research Services | British Columbia V3T<br>0H1<br>Canada                 |
| 6005              | Comité de Recherche du CHU de Québec-sous comité-A               |                                  | Quebec G1S<br>4L8<br>Canada                           |
| 6006              | Comite d'ethique de la recherche de CHUM                         |                                  | Montreal<br>Quebec<br>H2X 0A9                         |

| <b>Center No.</b> | <b>Ethics Committee or Institutional Review Board</b>                        | <b>Department / Organization</b> | <b>Address Country</b>                      |
|-------------------|------------------------------------------------------------------------------|----------------------------------|---------------------------------------------|
|                   |                                                                              |                                  | Canada                                      |
| 6007              | Ontario Cancer Research Ethics Board                                         |                                  | Toronto<br>Ontario M5G<br>0A3<br>Canada     |
| 6008              | Capital Health Research Ethics Board                                         |                                  | Halifax Nova<br>Scotia B3H<br>1V7<br>Canada |
| 5000              | Western Institutional Review Board                                           |                                  | Puyallup WA<br>98374<br>USA                 |
| 5001              | Western Institutional Review Board                                           |                                  | Olympia WA<br>98502-5010<br>USA             |
| 5002              | Western Institutional Review Board                                           |                                  | Puyallap WA<br>98374<br>USA                 |
| 5003              | Avera Institutional Review Board                                             |                                  | Sioux Fall<br>57108<br>USA                  |
| 5004              | Indiana University Institutional Review Board                                |                                  | Indianapolis IN<br>46202-2915<br>USA        |
| 5006              | Edwaed-Elmhurst Healthcare Institutional Review Board                        |                                  | Naperville<br>IL<br>60540<br>USA            |
| 5007              | Frederick Memorial Hospital Institutional Review Board                       |                                  | Frederick MD<br>21701<br>USA                |
| 5008              | Western Institutional Review Board                                           |                                  | Puyallup WA<br>98374-2115<br>USA            |
| 5010              | Human Subjects Protection Office, A115                                       |                                  | Hershey PA<br>17033-0855<br>USA             |
| 5011              | Office of research compliance & Quality improvement                          |                                  | Beverly Hills<br>CA<br>90211<br>USA         |
| 5012              | University of Texas Southwestern Medical Center - Institutional Review board |                                  | Dallas TX<br>75390<br>USA                   |

| <b>Center No.</b> | <b>Ethics Committee or Institutional Review Board</b> | <b>Department / Organization</b> | <b>Address Country</b>            |
|-------------------|-------------------------------------------------------|----------------------------------|-----------------------------------|
| 5016              | Florida Hospital Institutional Review Board           |                                  | Orlando FL<br>32804<br>USA        |
| 5017              | Glendale-Adventist Medical Center - IRB               |                                  | Glendale CA<br>91206<br>USA       |
| 5018              | Western Institutional Review Board                    |                                  | Puyallup WA<br>98374<br>USA       |
| 5019              | Johns Hopkins Medicine Institutional Review Board     |                                  | Baltimore MD<br>21205-1911<br>USA |
| 5022              | US oncology, Inc., IRB                                |                                  | The Woodlands TX<br>77380<br>USA  |
| 5024              | US oncology, Inc., IRB                                |                                  | The Woodlands TX<br>77380<br>USA  |
| 5025              | US oncology, Inc., IRB                                |                                  | The Woodlands TX<br>77380<br>USA  |
| 5026              | US oncology, Inc., IRB                                |                                  | The Woodlands TX<br>77380<br>USA  |
| 5027              | US oncology, Inc., IRB                                |                                  | The Woodlands TX<br>77380<br>USA  |
| 5028              | US oncology, Inc., IRB                                |                                  | The Woodlands TX<br>77380<br>USA  |
| 5029              | US oncology, Inc., IRB                                |                                  | The Woodlands TX<br>77380<br>USA  |
| 5030              | US oncology, Inc., IRB                                |                                  | The Woodlands TX<br>77380<br>USA  |
| 5031              | US oncology, Inc., IRB                                |                                  | The Woodlands TX<br>77380<br>USA  |

| <b>Center No.</b> | <b>Ethics Committee or Institutional Review Board</b>                    | <b>Department / Organization</b> | <b>Address Country</b>     |
|-------------------|--------------------------------------------------------------------------|----------------------------------|----------------------------|
| 5032              | US oncology, Inc., IRB                                                   |                                  | The Woodlands TX 77380 USA |
| 5034              | US oncology, Inc., IRB                                                   |                                  | The Woodlands TX 77380 USA |
| 5036              | US oncology, Inc., IRB                                                   |                                  | The Woodlands TX 77380 USA |
| 5041              | Western Insitutional Reveiw Board                                        |                                  | Payallup WA 98374 USA      |
| 5042              | Western Insitutional Reveiw Board                                        |                                  | Olympia WA 98502-5010 USA  |
| 5043              | Western Insitutional Reveiw Board                                        |                                  | Olympia WA 98502 USA       |
| 5044              | Western Insitutional Reveiw Board                                        |                                  | Olympia WA 98502 USA       |
| 5045              | Western Insitutional Reveiw Board                                        |                                  | Olympia WA 98502-5010 USA  |
| 5046              | Western Insitutional Reveiw Board                                        |                                  | Olympia WA 98502-5010 USA  |
| 5056              | Biomedical Research Alliance of New York, LLC/Institutional Review Board |                                  | Lake Success NY 11042 USA  |
| 5057              | Glens Falls Hospital                                                     |                                  | Glens Falls NY 12801 USA   |
| 5060              | Ingalls Memorial Hospital Institutional Reveiw Board                     |                                  | Harvey Illinois 60426 USA  |
| 5063              | Western Insitutional Reveiw Board                                        |                                  | Puyallup WA 94374 USA      |
| 5064              | Quoram Reveiw Inc.                                                       |                                  | Seattle WA 98101 USA       |

| <b>Center No.</b> | <b>Ethics Committee or Institutional Review Board</b>                                     | <b>Department / Organization</b> | <b>Address Country</b>           |
|-------------------|-------------------------------------------------------------------------------------------|----------------------------------|----------------------------------|
| 5067              | University of Chicago, Institutional Review Board                                         |                                  | Chicago IL<br>60637<br>USA       |
| 5068              | WIRB                                                                                      |                                  | Seattle WA<br>98101<br>USA       |
| 5069              | Mercy Medical Research Institutional Review board                                         |                                  | Springfield MO<br>65804<br>USA   |
| 5070              | Poudre Valley Health System IRB                                                           |                                  | Fort Collins CO 80525<br>USA     |
| 5071              | Duke University Health System IRB                                                         |                                  | Durham NC<br>27705<br>USA        |
| 5072              | Northshore University Health System Institutional Review Board                            |                                  | Evansville Illinois 60201<br>USA |
| 5074              | Institutional Review Board, University of California, Davis                               |                                  | Sacramento CA 95817<br>USA       |
| 5076              | Saint Luke's Hospital Institutional Review Board                                          |                                  | Kansas City MO 64111<br>USA      |
| 5078              | Western Institutional Review Board                                                        |                                  | Olympia WA<br>98502<br>USA       |
| 5080              | Cooper University Hospital Institutional Review Board                                     |                                  | Camden NJ<br>08103<br>USA        |
| 5083              | Western Institutional Review Board                                                        |                                  | Olympia WA<br>98502-5010<br>USA  |
| 5087              | Dana Farber Cancer Institutional Review Board, office for protection of research subjects |                                  | Boston MA<br>02215<br>USA        |
| 5088              | Dean Institutional Review Board                                                           |                                  | Middleton WI<br>53562<br>USA     |
| 5090              | Western Institutional Review Board                                                        |                                  | Olympia WA<br>98502 USA          |
| 5091              | Mercy Health Oklahoma Communities, Inc.                                                   |                                  | Oklahoma City OK 73120<br>USA    |

| <b>Center No.</b> | <b>Ethics Committee or Institutional Review Board</b>     | <b>Department / Organization</b> | <b>Address Country</b>           |
|-------------------|-----------------------------------------------------------|----------------------------------|----------------------------------|
| 5092              | Western Institutional Review Board                        |                                  | Puyallup WA<br>98374-2115<br>USA |
| 5093              | Western Institutional Review Board                        |                                  | Olympia WA<br>98502-5010<br>USA  |
| 5094              | Alta Bates Summit Institutional Review Board              |                                  | Berkeley CA<br>94705<br>USA      |
| 5095              | U.T. MD Anderson Cancer Center Institutional Review Board |                                  | Houston<br>Texas 77030<br>USA    |
| 5099              | Western Institutional Review Board                        |                                  | Puyallup WA<br>98374<br>USA      |
| 5600              | Vanderbilt University Institutional Board                 |                                  | Nashville TN<br>37232<br>USA     |
| 5603              | Western Institutional Review Board                        |                                  | Puyallup WA<br>98374<br>USA      |
| 5604              | Western Institutional review Board                        |                                  | Olympia WA<br>98502<br>USA       |
| 5607              | Western Institutional Review Board                        |                                  | Puyallup WA<br>98374-2115<br>USA |
| 5608              | Western Institutional Review Board                        |                                  | Olympia WA<br>98502-5010<br>USA  |
| 5609              | Western Institutional Review Board                        |                                  | Olympia WA<br>98502-5010<br>USA  |
| 5611              | Lehigh Valley Health Network Institutional Review Board   |                                  | Allentown<br>PA<br>18103<br>USA  |
| 5614              | Kaiser Permanente Hawaii Institutional Review Board       |                                  | Honolulu<br>Hawaii 96813<br>USA  |
| 5616              | Western Institutional Review Board                        |                                  | Puyallup WA<br>98374-2115<br>USA |
| 5618              | Western Institutional Review Board                        |                                  | Olympia WA<br>98502-5010<br>USA  |



| <b>Center No.</b> | <b>Ethics Committee or Institutional Review Board</b>                                                                                          | <b>Department / Organization</b> | <b>Address Country</b>                            |
|-------------------|------------------------------------------------------------------------------------------------------------------------------------------------|----------------------------------|---------------------------------------------------|
| 5622              | University of Miami<br>Human Subjects<br>Research Office                                                                                       |                                  | Miami FL<br>33136<br>USA                          |
| 5625              | Biomedical Research<br>Alliance of New York                                                                                                    |                                  | Lake Success<br>NY 11042<br>USA                   |
| 5628              | Western Institutional<br>Review Board                                                                                                          |                                  | Puyallup WA<br>98374<br>USA                       |
| 5630              | New York University<br>School of Medicine<br>IRB                                                                                               |                                  | New York<br>10016<br>USA                          |
| 5634              | Western Institutional<br>Review Board                                                                                                          |                                  | Puyallup WA<br>98374<br>USA                       |
| 5638              | Sacred Heart Health<br>System IRB                                                                                                              |                                  | Pensacola FL<br>32504<br>USA                      |
| 4100              | Comité de Ética en<br>Investigación Clínica<br>(CEIC)                                                                                          |                                  | C.A.B.A<br>C1117ABK<br>Argentina                  |
| 4101              | Comité Institucional de<br>Ética de la<br>Investigación en Salud<br>"Clínica Colombo"                                                          |                                  | Córdoba<br>X5002AOQ<br>Argentina                  |
| 4102              | Comité de Ética en<br>Investigación Clínica<br>(CEIC)                                                                                          |                                  | C.A.B.A<br>C1117ABK<br>Argentina                  |
| 4200              | Comitê de Ética em<br>Pesquisa do Centro de<br>Referência da Saúde<br>da Mulher                                                                |                                  | São Paulo<br>01317-010<br>Brazil                  |
| 4202              | Comitê de Ética em<br>Pesquisa do Hospital<br>das Clínicas da<br>Faculdade de<br>Medicina de Ribeirão<br>Preto da Universidade<br>de São Paulo |                                  | Ribeirão Preto<br>São Paulo<br>14048900<br>Brazil |
| 4203              | Comitê de Ética em<br>Pesquisa da<br>Faculdade de<br>Medicina da<br>Universidade de São<br>Paulo                                               |                                  | São Paulo<br>01246903<br>Brazil                   |
| 3800              | Regionala<br>Etikprovningarnamnden                                                                                                             |                                  | Goteborg 405<br>30                                |

| <b>Center No.</b> | <b>Ethics Committee or Institutional Review Board</b> | <b>Department / Organization</b>          | <b>Address Country</b>   |
|-------------------|-------------------------------------------------------|-------------------------------------------|--------------------------|
|                   | i Goteborg                                            |                                           | Sweden                   |
| 3801              | Regionala Etikprovsningsnamnden i Goteborg            |                                           | Goteborg 405 30 Sweden   |
| 3802              | Regionala Etikprovsningsnamnden i Goteborg            |                                           | Goteborg 405 30 Sweden   |
| 3803              | Regionala Etikprovsningsnamnden i Goteborg            |                                           | Goteborg 405 30 Sweden   |
| 3804              | Regionala Etikprovsningsnamnden i Goteborg            |                                           | Goteborg 405 30 Sweden   |
| 3805              | Regionala Etikprovsningsnamnden i Goteborg            |                                           | Goteborg 405 30 Sweden   |
| 3901              | West of Scotland Research Ethics Service              | The Tennent Institute, Western Infirmary, | Glasgow G11 6NT Scotland |
| 3902              | West of Scotland Research Ethics Service              | The Tennent Institute, Western Infirmary, | Glasgow G11 6NT Scotland |
