# Supplementary material
Source: PubMed Central journal article supplement (PMC8405616)
Supplement: 41416_2021_1415_MOESM2_ESM.pdf [file 41416_2021_1415_MOESM2_ESM.pdf]

## Appendix 16.1.3 List of Independent Ethics Committees (IECs) or Institutional Review Boards (IRBs) and representative written information for patients and sample consent forms

### 1 List of Independent Ethics Committees (IECs) or Institutional Review Boards (IRBs)

**Table 1-1 List of Independent Ethics Committees (IEC) or Institutional Review Boards (IRB) by study center**

| Center No. | Ethics Committee or Institutional Review Board                                  | Department / Organization                                                                     | City, State/Province, Postal Code Country |
|------------|---------------------------------------------------------------------------------|-----------------------------------------------------------------------------------------------|-------------------------------------------|
| 1000       | Bellberry Limited                                                               | Bellberry Human Resaerch Ethics Committee                                                     | Eastwood SA 5063 Australia                |
| 1002       | Bellberry Limited                                                               | Bellberry Human Resaerch Ethics Committee                                                     | Eastwood SA 5063 Australia                |
| 1003       | Bellberry Limited                                                               | Bellberry Human Resaerch Ethics Committee                                                     | Eastwood SA 5063 Australia                |
| 1004       | Flinders Medical Centre HREC                                                    | Flinders Medical Centre                                                                       | Bedford Park SA 5042 Australia            |
| 1200       | Seoul National University Hospital Institutional Review Board                   |                                                                                               | Seoul 03080 Korea, Republic of            |
| 1201       | Yonsei University Health System, Severance Hospital, Institutional review board |                                                                                               | Seoul 03722 Korea, Republic of            |
| 1202       | Samsung Mdical Center, Institutional review board                               |                                                                                               | Seoul 06351 Korea, Republic of            |
| 1400       | American University of Beirut Medical Center IRB                                |                                                                                               | Beirut Hamra 1107 2020 Lebanon            |
| 1401       | Hotel Dieu de France Hospital IRB                                               |                                                                                               | Beirut Achrafiyeh 166830 Lebanon          |
| 1600       | Domain Specific Review Board                                                    | Domain B                                                                                      | 169039 Singapore                          |
| 2000       | Ethik-Kommission                                                                | Medizinische Fakultaet der Eberhard-Karls-Universitaet und am Universitaetsklinikum Tuebingen | Tuebingen 72074 Germany                   |
| 2001       | Ethik-Kommission des Landes Berlin                                              | Landesamt fuer Gesundheit und Soziales                                                        | Berlin 10707 Germany                      |
| 2002       | Ethik-Kommission                                                                | Landesaerztekammer Thueringen                                                                 | Jena-Maua 07751 Germany                   |

| <b>Center No.</b> | <b>Ethics Committee or Institutional Review Board</b> | <b>Department / Organization</b>                                                                               | <b>City, State/Province, Postal Code Country</b> |
|-------------------|-------------------------------------------------------|----------------------------------------------------------------------------------------------------------------|--------------------------------------------------|
| 2003              | Ethik-Kommission                                      | Landesaerztekammer Baden-Wuerttemberg                                                                          | Stuttgart 70597 Germany                          |
| 2004              | Ethik-Kommission                                      | Universitaet Erlangen-Nuernberg Medizinische Fakultaet                                                         | Erlangen 91504 Germany                           |
| 2005              | Ethik-Kommission                                      | Landesaerztekammer Hessen                                                                                      | Frankfurt am Main 60488 Germany                  |
| 2006              | Ethik-Kommission des Landes Berlin                    | Landesamt fuer Gesundheit und Soziales                                                                         | Berlin 10707 Germany                             |
| 2007              | Ethik-Kommission                                      | Aerztekammer Westfalen-Lippe und der Medizinischen Fakultaet der Westfaelischen Wilhelms-Universitaet Muenster | Muenster 48147 Germany                           |
| 2008              | Ethik-Kommission                                      | Landesaerztekammer Baden-Wuerttemberg                                                                          | Stuttgart 70597 Germany                          |
| 2009              | Ethikkommission der Aerztekammer Nordrhein            |                                                                                                                | Duesseldorf 40474 Germany                        |
| 2010              | Ethik-Kommission                                      | Universitaet zu Luebeck Medizinische Fakultaet                                                                 | Luebeck 23538 Germany                            |
| 2011              | Ethik-Kommission                                      | Aerztekammer Nordrhein                                                                                         | Duesseldorf 40474 Germany                        |
| 2014              | Ethik-Kommission                                      | Aerztekammer des Saarlandes                                                                                    | Saarbruecken 66111 Germany                       |
| 2015              | Ethikkommission der Landesärztekammer Bayern          |                                                                                                                | München 81677 Germany                            |
| 2016              | Ethik-Kommission                                      | Technische Universitaet Dresden Medizinische Fakultaet                                                         | Dresden 01307 Germany                            |
| 2018              | Ethik-Kommission                                      | Fakultaet fuer Medizin der TU Muenchen                                                                         | Muenchen 81675 Germany                           |
| 2019              | Ethikkommission der Aerztekammer Nordrhein            |                                                                                                                | Duesseldorf 40474 Germany                        |
| 2020              | Ethik-Kommission                                      | Aerztekammer Niedersachsen                                                                                     | Hannover 30175 Germany                           |
| 2021              | Ethik-Kommission                                      | Aerztekammer Hamburg                                                                                           | Hamburg 22083 Germany                            |
| 2022              | Ethik-Kommission                                      | Bayerische Landesaerztekammer                                                                                  | Muenchen 81677 Germany                           |
| 2025              | Ethik-Kommission                                      | Bayerische Landesaerztekammer                                                                                  | Muenchen 81677 Germany                           |
| 2026              | Ethik-Kommission                                      | Bayerische Landesaerztekammer                                                                                  | Muenchen 81677 Germany                           |
| 2027              | Ethik-Kommission                                      | Aerztekammer Hamburg                                                                                           | Hamburg 22083 Germany                            |

| <b>Center No.</b> | <b>Ethics Committee or Institutional Review Board</b>                         | <b>Department / Organization</b>     | <b>City, State/Province, Postal Code Country</b>   |
|-------------------|-------------------------------------------------------------------------------|--------------------------------------|----------------------------------------------------|
| 2028              | Ethik-Kommission                                                              | Aerztekammer Niedersachsen           | Hannover 30175<br>Germany                          |
| 2029              | Ethik-Kommission                                                              | Aerztekammer Nordrhein               | Duesseldorf 40474<br>Germany                       |
| 2030              | Ethik-Kommission                                                              | Aerztekammer Niedersachsen           | Hannover 30175<br>Germany                          |
| 2200              | Intezeti Etikai Bizottsag                                                     |                                      | Budapest 1134<br>Hungary                           |
| 2201              | Regionalis es Intezmenyi Kutatasetikai Bizottsag                              |                                      | Debrecen 4012<br>Hungary                           |
| 2202              | Kutatasetikai Bizottsag                                                       |                                      | Szolnok 5000<br>Hungary                            |
| 2204              | Tudomanyos es Intezeti Kutatasetikai Bizottsag                                |                                      | Budapest 1032<br>Hungary                           |
| 2205              | Intezeti Etikai Bizottsag                                                     |                                      | Budapest 1122<br>Hungary                           |
| 2401              | NRES Committee East of England - Cambridge South                              |                                      | Gonville Place Cambridge CB1 1LY<br>United Kingdom |
| 2403              | East of England – Cambridge South Research Ethics Committee                   | National Research and Ethics Service | Nottingham NG1 6FS<br>UK                           |
| 2600              | Etická komise MOU                                                             |                                      | Brno 656 53<br>Czech Republic                      |
| 2601              | Etická komise Nemocnice Na Bulovce                                            |                                      | Prague 8 180 81<br>Czech Republic                  |
| 2602              | Etická komise Všeobecné fakulní nemocnice v Praze                             |                                      | Prague 2 128 08<br>CZECH REPUBLIC                  |
| 2603              | Etická komise pro multicestrické klinické hodnocení Krajská nemocnice Liberec |                                      | Liberec 460 63<br>Czech Republic                   |
| 2604              | Etická komise Fakulní nemocnice Brno                                          |                                      | Brno 625 00<br>Czech Republic                      |
| 2800              | King Hussein Cancer Center Institutional Review Board                         |                                      | Amman 11941<br>Jordan                              |
| 3000              | CPP Est IV                                                                    |                                      | Strasbourg 67091<br>France                         |
| 3002              | CPP Est IV                                                                    |                                      | Strasbourg 67091<br>France                         |
| 3003              | CPP Est IV                                                                    |                                      | Strasbourg 67091<br>France                         |

| <b>Center No.</b> | <b>Ethics Committee or Institutional Review Board</b>   | <b>Department / Organization</b> | <b>City, State/Province, Postal Code Country</b> |
|-------------------|---------------------------------------------------------|----------------------------------|--------------------------------------------------|
| 3006              | CPP Est IV                                              |                                  | Strasbourg 67091<br>France                       |
| 3009              | CPP Est IV                                              |                                  | Strasbourg 67091<br>France                       |
| 3010              | CPP Est IV                                              |                                  | Strasbourg 67091<br>France                       |
| 3013              | CPP Est IV                                              |                                  | Strasbourg 67091<br>France                       |
| 3014              | CPP Est IV                                              |                                  | Strasbourg 67091<br>France                       |
| 3015              | CPP Est IV                                              |                                  | Strasbourg 67091<br>France                       |
| 3016              | CPP Est IV                                              |                                  | Strasbourg 67091<br>France                       |
| 3017              | CPP Est IV                                              |                                  | Strasbourg 67091<br>France                       |
| 3018              | CPP Est IV                                              |                                  | Strasbourg 67091<br>France                       |
| 3019              | CPP Est IV                                              |                                  | Strasbourg 67091<br>France                       |
| 3023              | CPP Est IV                                              |                                  | Strasbourg 67091<br>France                       |
| 3200              | Comite d'ethique hospitalo-facultaire - CHU de Liege    |                                  | Liege 4000<br>Belgium                            |
| 3201              | Commissie Medische Ethiek van de UZ Leuven              |                                  | Leuven 3000<br>Belgium                           |
| 3202              | Ethische Toetsingscommissie van het Jessa Ziekenhuis    |                                  | Hasselt 3500<br>Belgium                          |
| 3203              | Comite d'ethique de la CMSE Namur                       |                                  | Namur 5000<br>Belgium                            |
| 3204              | Comite d'ethique du GHdC                                |                                  | Charleroi 6000<br>Belgium                        |
| 3205              | Ethisch Comite van het OLVZ Aalst                       |                                  | Aalst 9300<br>Belgium                            |
| 3401              | Ethikkommission der Stadt Wien                          |                                  | Vienna 1030<br>Austria                           |
| 3402              | Ethikkommission der Medizinischen Universitat Wien      |                                  | Wien 1090<br>Austria                             |
| 3404              | Ethikkommission der medizinischen Universitat Innsbruck |                                  | Innsbruck 6020<br>Austria                        |

| <b>Center No.</b> | <b>Ethics Committee or Institutional Review Board</b>                                   | <b>Department / Organization</b>                                                                     | <b>City, State/Province, Postal Code Country</b> |
|-------------------|-----------------------------------------------------------------------------------------|------------------------------------------------------------------------------------------------------|--------------------------------------------------|
| 3600              | Regional komite for medisinsk og helsefaglig forskningsetikk                            |                                                                                                      | Oslo 0484<br>Norway                              |
| 3800              | De Videnskabsetiske Komiteer                                                            | De Videnskabsetiske Komiteer for Region Syddanmark<br>Regionshuset<br>Damhaven 12                    | Vejle Region Syd 7100<br>Denmark                 |
| 3801              | De Videnskabsetiske Komiteer for Region Syddanmark                                      | De Videnskabsetiske Komiteer for Region Syddanmark                                                   | Vejle NA 7100<br>Denmark                         |
| 3802              | De Videnskabsetiske Komiteer for Region Syddanmark                                      | De Videnskabsetiske Komiteer for Region Syddanmark                                                   | Vejle NA<br>Denmark                              |
| 3803              | De Videnskabsetiske Komiteer                                                            | De Videnskabsetiske Komiteer for Region Syddanmark<br>Regionshuset<br>Damhaven 12                    | Vejle Region Syd 7100<br>Denmark                 |
| 3804              | De Videnskabsetiske Komiteer for Region Syddanmark                                      | De Videnskabsetiske Komiteer for Region Syddanmark                                                   | Vejle NA<br>Denmark                              |
| 3805              | De Videnskabsetiske Komiteer                                                            | De Videnskabsetiske Komiteer for Region Syddanmark<br>Regionshuset<br>Damhaven 12                    | Vejle Region Syd 7100<br>Denmark                 |
| 4000              | Comitato Etico                                                                          | Istituto Clinico Humanitas<br>Via Manzoni, 56                                                        | Rozzano Milano<br>Italy                          |
| 4002              | COMITATO ETICO DELLA PROVINCIA DI BRESCIA                                               | AO Spedali Civili                                                                                    | BRESCIA BS 25123<br>ITALY                        |
| 4003              | Spettabile Comitato Etico Indipendente                                                  | Fondazione IRCCS Istituto Nazionale dei Tumori di Milano<br>Via Venezian<br>Giacomo, 1               | Milano Milano<br>Italy                           |
| 4004              | Spettabile Comitato Catania 2                                                           | c/o AORNAS Garibaldi<br>Piazza S.M. Gesù, 5                                                          | Catania Catania<br>Italy                         |
| 4006              | Spettabile Comitato della ASL LE di Lecce                                               | Via Miglietta, 5                                                                                     | LECCE LE 73100<br>Italy                          |
| 4007              | Comitato Etico                                                                          | Istituto Nazionale per lo Studio e la Cura dei Tumori "Fondazione G. Pascale"<br>Via Mariano Semmola | Napoli Napoli<br>Italy                           |
| 4008              | Spettabile Comitato per la Sperimentazione Clinica dei Medicinali Area Vasta Nord Ovest | Azienda Ospedaliero Universitaria Pisana di Pisa,<br>Via Roma 67                                     | Pisa Pisa<br>Italy                               |

| <b>Center No.</b> | <b>Ethics Committee or Institutional Review Board</b>                  | <b>Department / Organization</b>                          | <b>City, State/Province, Postal Code Country</b> |
|-------------------|------------------------------------------------------------------------|-----------------------------------------------------------|--------------------------------------------------|
| 4010              | Comitato Etico per le Province di L'Aquila e Teramo                    | ASL1<br>Avezzano/Sulmona/L'Aquila<br>via XX Settembre, 27 | Avezzano AQ<br>Italy                             |
| 4200              | Amphia Academy (AMOA)                                                  |                                                           | Breda 90157<br>4800 RL<br>Netherlands            |
| 4201              | PTC                                                                    |                                                           | Amsterdam 1066 CX<br>Netherlands                 |
| 4202              | RvB MST                                                                |                                                           | Enschede 7513 JX<br>Netherlands                  |
| 4203              | MEC Antonius                                                           |                                                           | Nieuwegein 3435 CM<br>Netherlands                |
| 4204              | Zuyderland Medisch Centrum, locatie Heerlen                            |                                                           | Sittard-Geleen 6162 BG<br>Netherlands            |
| 4205              | ETZ TweeSteden                                                         |                                                           | Tilburg 5042 AD<br>Netherlands                   |
| 4206              | METC azM/UM                                                            |                                                           | Maastricht 6229 HX<br>Netherlands                |
| 4207              | MEC Groningen                                                          |                                                           | Groningen 9728 NZ<br>Netherlands                 |
| 4208              | BoD Deventer hospital                                                  |                                                           | Deventer 7416 SE<br>Netherlands                  |
| 4213              | ACLU                                                                   |                                                           | Hoofddorp 2134 TM<br>Netherlands                 |
| 4216              | Trial begeleidings commissie                                           |                                                           | Roermond 6043 CV<br>Netherlands                  |
| 4218              | METC Zuidwest Holland                                                  |                                                           | Den haag 2545 CH<br>Netherlands                  |
| 4400              | Ethikkommission Nordwest- und Zentralschweiz (EKNZ)                    |                                                           | Basel CH-4056<br>Switzerland                     |
| 4405              | Kantonale Ethikkommission Zürich                                       |                                                           | Zurich CH-8090<br>Switzerland                    |
| 4406              | Ethikkommission Nordwest- und Zentralschweiz (EKNZ)                    |                                                           | Basel CH-4056<br>Switzerland                     |
| 4600              | Comité Coordinador de Ética de la Investigación Biomédica de Andalucía | Consejería de Salud                                       | Sevilla 41020<br>Spain                           |
| 4601              | Hospital Univ. Puerta de Hierro Majadahonda                            | Secretaría Técnica del CEIC                               | Majadahonda Madrid 28222<br>Spain                |
| 4602              | Agencia de Ensayos Clínicos Servicio de Farmacia                       | Hospital Clínic de Barcelona                              | Barcelona 08036<br>Spain                         |
| 4603              | Ceic Area 1 Fundacion Investigacion Biomedica                          | Hospital General Gregorio Maranon                         | Madrid 28007<br>Spain                            |

| <b>Center No.</b> | <b>Ethics Committee or Institutional Review Board</b>                                         | <b>Department / Organization</b>                                           | <b>City, State/Province, Postal Code Country</b> |
|-------------------|-----------------------------------------------------------------------------------------------|----------------------------------------------------------------------------|--------------------------------------------------|
| 4604              | Hospital Universitario la Paz<br>Secretaría Técnica del Comité Ético de Investigación Clínica |                                                                            | Madrid 28046<br>Spain                            |
| 4605              | Comité Coordinador de Ética de la Investigación Biomédica de Andalucía                        | Consejería de Salud                                                        | Sevilla 41020<br>Spain                           |
| 4606              | Comité Ético De Investigación Clínica<br>Hospital Universitario De Salamanca                  |                                                                            | Salamanca 37007<br>Spain                         |
| 4609              | Comité Coordinador de Ética de la Investigación Biomédica de Andalucía                        | Consejería de Salud                                                        | Sevilla 41020<br>Spain                           |
| 4610              | Comité Coordinador de Ética de la Investigación Biomédica de Andalucía                        | Consejería de Salud                                                        | Sevilla 41020<br>Spain                           |
| 4612              | Comité Ético de Investigación Clínica                                                         | Área 8- Fundación Hospital de Alcorcón                                     | Alcorcón Madrid 28922<br>Spain                   |
| 4613              | Comité Ético de Investigación Clínica De Galicia                                              | Subdirección de Farmacia y Productos Sanitarios<br>Consellería de Sanidade | Santiago de Compostela 15703<br>Spain            |
| 4614              | CEIC-Concorci Sanitari Integral                                                               | Hospital General de l'Hospitalet                                           | Barcelona<br>Spain                               |
| 4800              | Regionala Etikprövningsnamnden i Stockholm                                                    | FE 289                                                                     | Stockholm 17177<br>Sweden                        |
| 4801              | Regionala Etikprövningsnamnden i Stockholm                                                    | FE 289                                                                     | Stockholm 17177<br>Sweden                        |
| 4803              | Regionala Etikprövningsnamnden i Stockholm                                                    | FE 289                                                                     | Stockholm 17177<br>Sweden                        |
| 5000              | Penn State Milton S. Hershey Medical Center, Penn State College of Medicine                   | Human Subjects Protection Office                                           | Hershey PA 17033<br>United States                |
| 5001              | Quorum IRB                                                                                    |                                                                            | Seattle WA 98101<br>United States                |
| 5002              | Quorum IRB                                                                                    |                                                                            | Seattle WA 98101<br>United States                |
| 5004              | Quorum IRB                                                                                    |                                                                            | Seattle WA 98101<br>United States                |
| 5005              | Quorum Review, Inc.                                                                           |                                                                            | Seattle WA 98101<br>United States                |

| <b>Center No.</b> | <b>Ethics Committee or Institutional Review Board</b>        | <b>Department / Organization</b> | <b>City, State/Province, Postal Code Country</b> |
|-------------------|--------------------------------------------------------------|----------------------------------|--------------------------------------------------|
| 5007              | NYU School of Medicine IRB                                   |                                  | New York NY 10016<br>United States               |
| 5009              | Quorum Review IRB                                            |                                  | Seattle WA 98101<br>United States                |
| 5010              | Quorum IRB                                                   |                                  | Seattle WA 98101<br>United States                |
| 5011              | Western Institutional Review Board                           |                                  | Puyallup WA 98374<br>United States               |
| 5012              | Kaiser Permanente Hawaii Institutional Review Board          |                                  | Honolulu HI<br>United States                     |
| 5013              | Quorum Review, Inc.                                          |                                  | Seattle WA 98101<br>United States                |
| 5014              | Quorum Review IRB                                            |                                  | Seattle WA 98101<br>United States                |
| 5016              | Quorum IRB                                                   |                                  | Seattle WA 98101<br>United States                |
| 5020              | UCLA Office of the Human Research Protection Program (OHRPP) |                                  | Los Angeles CA 90095<br>United States            |
| 5026              | Glen Falls Hospital                                          |                                  | Glen Falls New York 12801<br>United States       |
| 5027              | Quorum                                                       |                                  | Seattle WA 98101<br>USA                          |
| 5029              | Genesis Healthcare System IRB                                |                                  | Zanesville Ohio 43701<br>USA                     |
| 5031              | Western Institutional Review Board                           |                                  | Puyallup WA 983742115<br>USA                     |
| 5032              | University of Colorado Health Institutional Review Board     |                                  | Philadelphia PA 19103<br>USA                     |
| 5033              | Western Institutional Review Board                           |                                  | Puyallup WA 983742115<br>USA                     |
| 5034              | Quorum                                                       |                                  | Seattle WA 98101<br>USA                          |
| 5038              | Quorum Review Inc. (QIRB)                                    |                                  | Seattle WA 98101<br>USA                          |
| 5041              | Western Institutional Review Board                           |                                  | Puyallup WA 983742115<br>USA                     |
| 5042              | Western Institutional Review Board                           |                                  | Puyallup WA 983742115<br>USA                     |
| 5046              | Quorum Review IRB                                            |                                  | Seattle WA 98101<br>USA                          |
| 5051              | Quorum Review IRB                                            |                                  | Seattle WA 98101<br>USA                          |



| <b>Center No.</b> | <b>Ethics Committee or Institutional Review Board</b>                                        | <b>Department / Organization</b>          | <b>City, State/Province, Postal Code Country</b> |
|-------------------|----------------------------------------------------------------------------------------------|-------------------------------------------|--------------------------------------------------|
| 6000              | IRB Services                                                                                 |                                           | Aurora Ontario L4G 0A5<br>Canada                 |
| 6001              | Nova Scotia Health Authority Research Ethics Board                                           | Centre for Clinical Research              | Halifax NS B3H 1V7<br>Canada                     |
| 6002              | Research Ethics Board of the Vitalité Health Network                                         |                                           | Bathurst New-Brunswick E2A 1A9<br>Canada         |
| 6004              | OCREB                                                                                        |                                           | Toronto ON M5G 0A3<br>Canada                     |
| 6005              | OCREB                                                                                        |                                           | Toronto ON M5G0A3<br>Canada                      |
| 6006              | Ontario Cancer Research Ethics Board                                                         |                                           | Toronto Ontario MSG 0A3<br>Canada                |
| 6007              | UBC BCCA Research Ethics Board (BCCA REB) Fairmont Medical Building                          | 750 West Broadway, Suite 902              | Vancouver British Columbia V5Z 1H5<br>Canada     |
| 6008              | UBC BCCA Research Ethics Board (BCCA REB) Fairmont Medical Building                          | 750 West Broadway, Suite 902              | Vancouver British Columbia V5Z 1H5<br>Canada     |
| 6009              | UBC BCCA Research Ethics Board                                                               |                                           | Vancouver BC V5Z 1H8<br>Canada                   |
| 6010              | Comite d'ethique de la recherche du Centre de Santé et de Services Sociaux de Trois-Rivières |                                           | Trois-Rivieres Quebec G8Z 1V2<br>Canada          |
| 6011              | Comite d'ethique de la recherche du Centre de Santé et de Services Sociaux de Trois-Rivières |                                           | Trois-Rivieres Quebec G8Z 1V2<br>Canada          |
| 6012              | Comite d'Ethique de la Recherche du CIUSSS de l'Estrie – CHUS                                |                                           | Sherbrooke QC J1H 5N4<br>Canada                  |
| 6600              | Comite de Etica e Investigaciones                                                            |                                           | Monteria Cordoba<br>Colombia                     |
| 6601              | Comite de etica en Investigación Clínica                                                     | Bogota, DC                                | Bogota DC Bogotá DC 110221<br>Colombia           |
| 6802              | Oaxaca Site Management Organization, S.C.                                                    | Oaxaca Site Management Organization, S.C. | Oaxaca Oaxaca 68000<br>Mexico                    |
| 8201              | Ethics Committee for Multicenter Trials                                                      |                                           | Sofia 1000<br>Bulgaria                           |

| <b>Center No.</b> | <b>Ethics Committee or Institutional Review Board</b>                             | <b>Department / Organization</b>              | <b>City, State/Province, Postal Code Country</b> |
|-------------------|-----------------------------------------------------------------------------------|-----------------------------------------------|--------------------------------------------------|
| 8202              | Ethics Committee for Multicenter Trials                                           |                                               | Sofia 1000 Bulgaria                              |
| 8204              | Ethics Committee for Multicenter Trials                                           |                                               | Sofia 1000 Bulgaria                              |
| 8600              | Medical Research and Ethics Committee                                             | Medical Research and Ethics Committee         | Kuala Lumpur Kuala Lumpur 59000 Malaysia         |
| 8601              | Medical Research Ethics Committee (MREC)                                          | -                                             | Kuala Lumpur Kuala Lumpur 59000 Malaysia         |
| 8801              | Komisja Bioetyczna przy Okregowej Izbie Lekarskiej                                |                                               | Krakow 31-123 Poland                             |
| 8804              | Komisja Bioetyczna przy Okregowej Izbie Lekarskiej                                |                                               | Krakow 31-123 Poland                             |
| 9000              | Comissão de Ética para a Investigação Clínica (CEIC)                              | N/A                                           | Lisbon Lisbon 1749-004 Lisbon Portugal           |
| 9001              | Comissão de Ética para a Investigação Clínica (CEIC)                              | N/A                                           | Lisbon Lisbon 1749-004 Lisbon Portugal           |
| 9200              | Ethic committee under Arkhangelsk clinical oncology dispensary                    | NA                                            | Arkhangelsk Arkhangelsk Russia                   |
| 9204              | Independent Ethic Committee                                                       | Tambov regional clinical oncology dispensary  | Tambov Tambov Russia                             |
| 9400              | Institutional Review Board                                                        | Faculty of Medicine, Chulalongkorn University | Bangkok 10330 Thailand                           |
| 9401              | Central Research Ethics Committee                                                 |                                               | Bangkok 10900 Thailand                           |
| 9600              | Istanbul University Cerrahpaşa Medical Faculty Clinical Research Ethics Committee | Clinical Research                             | Istanbul NA Turkey                               |
| 9602              | Istanbul University Cerrahpaşa Medical Faculty Clinical Research Ethics Committee | Clinical Research                             | Istanbul NA Turkey                               |
| 9603              | Istanbul University Cerrahpaşa Medical Faculty Clinical Research Ethics Committee | Clinical Research                             | Istanbul NA Turkey                               |
| 9604              | Istanbul University Cerrahpaşa Medical Faculty Clinical Research Ethics Committee | Clinical Research                             | Istanbul NA Turkey                               |
