# Supplementary material
Source: PubMed Central journal article supplement (PMC8405616)
Supplement: 41416_2021_1415_MOESM3_ESM.pdf [file 41416_2021_1415_MOESM3_ESM.pdf]

## Appendix 16.1.3 List of Independent Ethics Committees (IECs) or Institutional Review Boards (IRBs) and representative written information for patients and sample consent forms

### 1 List of Independent Ethics Committees (IECs) or Institutional Review Boards (IRBs)

**Table 1-1 List of Independent Ethics Committees (IEC) or Institutional Review Boards (IRB) by study center**

| Center No. | Ethics Committee or Institutional Review Board                                                        | Department / Organization                                           | Address Country                     |
|------------|-------------------------------------------------------------------------------------------------------|---------------------------------------------------------------------|-------------------------------------|
| 1000       | Eastern Health                                                                                        | Research Governance and Ethics                                      | Box Hill VIC 3128 Australia         |
| 1001       | Calvary health care Newcastle Limited                                                                 | Research Governance and Ethics                                      | Waratah NSW 2298 Australia          |
| 1002       | St John of God health Care Human Research Ethics Committee                                            | Human Research Ethics Committee                                     | Wembley WA 6014 Australia           |
| 1003       | Austin health                                                                                         | Human Research Ethics Committee                                     | Heidelberg VIC 3084 Australia       |
| 1004       | Bell berry Human Research Ethics Committee                                                            | Human Research Ethics Committee                                     | Eastwood SA 5063 Australia          |
| 1200       | Joint Chinese University of Hong Kong-New Territories East Cluster Clinical Research Ethics Committee | NA                                                                  | Hong Kong NA NA Hong Kong           |
| 1201       | Research Ethics Committee (Kowloon Central / Kowloon East)                                            | NA                                                                  | Hong Kong NA NA Hong Kong           |
| 1203       | UNIMED Medical Institute Institutional Review Board                                                   | NA                                                                  | Hong Kong NA NA Hong Kong           |
| 1301       | Institutional Ethics Committee                                                                        | NA                                                                  | Bangalore Karnataka 560095 India    |
| 1302       | Manavta Clinical Research Institute Ethics Committee                                                  | NA                                                                  | Nashik Maharashtra 422001 India     |
| 1304       | 1. Institutional Ethics Committee 1,<br>2. Institutional Ethics Committee 2                           | NA                                                                  | Mumbai Maharashtra India            |
| 1305       | Ethical Committee                                                                                     | NA                                                                  | Kolkata West Bengal 700053 India    |
| 1400       | Institutional Review Board                                                                            | Yonsei University Health System -Severance Hospital                 | Seoul NA 03722 Korea, republic of   |
| 1401       | Seoul National University Bundang Hospital Institutional Review Board                                 | Clinical Trial Center of Seoul National University Bundang Hospital | Seongnam-Si Gyeonggi-Do South Korea |
| 1402       | Institutional Review Board                                                                            | Samsung Medical center                                              | Seoul NA 06351 Korea, Republic of   |

| <b>Center No.</b> | <b>Ethics Committee or Institutional Review Board</b>              | <b>Department / Organization</b>                                                        | <b>Address Country</b>                         |
|-------------------|--------------------------------------------------------------------|-----------------------------------------------------------------------------------------|------------------------------------------------|
| 1403              | Asan Medical Center Institutional Review Board                     | Clinical Trial Center of Asan Medical Center                                            | Seoul Seoul South Korea                        |
| 1404              | Institutional Review Board                                         | National Cancer center                                                                  | Goyang-si Gyeonggi-do 10408 Korea, Republic of |
| 1405              | Seoul National University Hospital Institutional Review Board      | Center for Human Research Protection of Seoul National University Hospital              | Seoul Seoul 03080 South Korea                  |
| 1500              | Hammoud Hospital IRB                                               | Hammoud Hospital                                                                        | Saida Saida NA Lebanon                         |
| 1501              | American University of Beirut IRB                                  | American University of Beirut                                                           | Beirut Beirut NA Lebanon                       |
| 1502              | Ethics Committee-Hotel Dieu De France                              | Saint Joseph University                                                                 | Beirut Beirut NA Lebanon                       |
| 1503              | Bellevue Medical Center IRB                                        | Bellevue Medical Center                                                                 | Beirut Beirut NA Lebanon                       |
| 1504              | Saint Georges Hospital IRB                                         | University of Balamand                                                                  | Beirut Beirut NA Lebanon                       |
| 1505              | Ain Wazein IRB                                                     | Ain Wazein Hospital                                                                     | Al Chouf Al Chouf NA Lebanon                   |
| 1601              | LEC under Arkhangelsk Clinical Oncology Dispensary                 | Arkhangelsk Oncology Regional Center 145/1, Obvodniy Kanal, Arkhangelsk, Russia, 163045 | Arkhangelsk NA Russia                          |
| 1603              | LEC under BioEq                                                    | BioEq, LLC, 23, Krasnogvardeyskiy, per. Saint-Petersburg, Russia, 197342                | Saint-Petersburg NA Russia                     |
| 1702              | King Abdulaziz Medical City, KAIMRC, National Guard Health affairs | Biomedical Ethics section                                                               | Riyadh Central 22490 Saudi Arabia              |
| 1800              | Centralised Institutional Review Board                             | CIRB B                                                                                  | NA NA Singapore                                |
| 1801              | Centralised Institutional Review Board                             | CIRB B                                                                                  | NA NA Singapore                                |
| 1900              | Chulalongkorn Institutional Review Board                           | Faculty of medicine, Chulalongkorn University                                           | Patumwan Bangkok Thailand                      |
| 1901              | Siriraj Institutional Review Board                                 | Faculty of Medicine Siriraj Hospital, Mahidol University                                | Bangkoknoi Bangkok 10700 Thailand              |
| 2000              | Research Ethics Committee, National Taiwan University Hospital     | Research Ethics Committee C                                                             | Taipei NA 100 R.O.C                            |
| 2001              | Taipei Veterans General Hospital Institutional Review Board        | Institutional Review Board                                                              | Taipei City NA R.O.C                           |
| 2002              | Taipei Medical University – Joint Institutional Review Board       | NA                                                                                      | New Taipei City NA R.O.C                       |
| 2003              | Mackay Memorial Hospital Institutional Review Board                | Institutional Review Board (2)                                                          | Taipei City NA R.O.C                           |
| 2004              | Institutional Review Board Committee Koo Foundation Sun Yat-Sen    | NA                                                                                      | Taipei City NA R.O.C                           |

| <b>Center No.</b> | <b>Ethics Committee or Institutional Review Board</b>                          | <b>Department / Organization</b>                                  | <b>Address Country</b>                                                                       |
|-------------------|--------------------------------------------------------------------------------|-------------------------------------------------------------------|----------------------------------------------------------------------------------------------|
|                   | Cancer Center                                                                  |                                                                   |                                                                                              |
| 2005              | Chang Gung Medical Foundation Institutional Review Board                       | Institutional Review Board A                                      | Taipei City NA<br>R.O.C                                                                      |
| 2006              | Institutional Review Board Committee, Changhua Christian Hospital, Taiwan      | Institutional Review Board Committee A                            | Changhua NA 500<br>R.O.C                                                                     |
| 2007              | Chang Gung Medical Foundation Institutional Review Board                       | Institutional Review Board A                                      | Taipei City NA 10507<br>R.O.C                                                                |
| 2100              | İstanbul Üniversitesi Cerrahpaşa Tıp Fakültesi Klinik Araştırmalar Etik Kurulu | İstanbul Üniversitesi Cerrahpaşa Tıp Fakültesi Dekanlığı          | İstanbul Cerrahpaşa 34098<br>Turkey                                                          |
| 2101              | İstanbul Üniversitesi Cerrahpaşa Tıp Fakültesi Klinik Araştırmalar Etik Kurulu | İstanbul Üniversitesi Cerrahpaşa Tıp Fakültesi Dekanlığı          | İstanbul Cerrahpaşa 34098<br>Turkey                                                          |
| 2102              | İstanbul Üniversitesi Cerrahpaşa Tıp Fakültesi Klinik Araştırmalar Etik Kurulu | İstanbul Üniversitesi Cerrahpaşa Tıp Fakültesi Dekanlığı          | İstanbul Cerrahpaşa 34098<br>Turkey                                                          |
| 2103              | İstanbul Üniversitesi Cerrahpaşa Tıp Fakültesi Klinik Araştırmalar Etik Kurulu | İstanbul Üniversitesi Cerrahpaşa Tıp Fakültesi Dekanlığı          | İstanbul Cerrahpaşa 34098<br>Turkey                                                          |
| 2104              | İstanbul Üniversitesi Cerrahpaşa Tıp Fakültesi Klinik Araştırmalar Etik Kurulu | İstanbul Üniversitesi Cerrahpaşa Tıp Fakültesi Dekanlığı          | İstanbul Cerrahpaşa 34098<br>Turkey                                                          |
| 2105              | İstanbul Üniversitesi Cerrahpaşa Tıp Fakültesi Klinik Araştırmalar Etik Kurulu | İstanbul Üniversitesi Cerrahpaşa Tıp Fakültesi Dekanlığı          | İstanbul Cerrahpaşa 34098<br>Turkey                                                          |
| 2200              | Al Ain Medical District Human Research Ethics Committee                        | College of medicine UAE University                                | Al Ain Abu Dhabi NA<br>United Arab Emirates                                                  |
| 2500              | Comite de Etica en Investigacion Clinica (CEIC)                                | NA                                                                | Buenos Aires Buenos Aires Larrea 1381 Dept 3 Floor Apt "A" – zip code: C1117ABK<br>Argentina |
| 2501              | Comite Institucional de Etica de la Investigacion en Salud Clin. Reina Fabiola | NA                                                                | Cordoba Cordoba Oncativo 1248 – zip code: X5004FHP<br>Argentina                              |
| 2502              | Comite de Etica en Investigacion Clinica (CEIC)                                | NA                                                                | Buenos Aires Buenos Aires Larrea 1381 Dept 3 Floor Apt "A" – zip code: C1117ABK<br>Argentina |
| 2600              | Comite de Etica en Investigacion Clinica- Clinica del Country                  | Investigacion Clinica-Clinica del Country                         | Bogotá Cundinamarca 110221<br>Colombia                                                       |
| 2601              | Comite de Etica e investigaciones de Oncomedica S.A                            | Investigación Clínica-Oncomedica                                  | Montería Cordoba 230017<br>Colombia                                                          |
| 2700              | Comité de Ética en Investigación de la Clínica Bajío CLINBA, S.C.              | Comité de Ética en Investigación de la Clínica Bajío CLINBA, S.C. | Guanajuato Guanajuato 36090<br>Mexico                                                        |
| 2706              | Comité de Ética en Investigación de la Clínica                                 | Comité de Ética en Investigación de la Clínica                    | Guanajuato Guanajuato<br>Mexico                                                              |

| <b>Center No.</b> | <b>Ethics Committee or Institutional Review Board</b>                                                                                                       | <b>Department / Organization</b>                                                                                                                            | <b>Address Country</b>                         |
|-------------------|-------------------------------------------------------------------------------------------------------------------------------------------------------------|-------------------------------------------------------------------------------------------------------------------------------------------------------------|------------------------------------------------|
|                   | Bajío CLINBA, S.C.                                                                                                                                          | Bajío CLINBA, S.C.                                                                                                                                          |                                                |
| 2709              | Comité de ética en Investigación de la Escuela de Medicina del Instituto Tecnológico y de Estudios Superiores de Monterrey                                  | Comité de ética en Investigación de la Escuela de Medicina del Instituto Tecnológico y de Estudios Superiores de Monterrey                                  | Monterrey Nuevo León 64710 Mexico              |
| 2800              | Comitê de Ética em Pesquisa da Fundação PIO XII- Hospital de Câncer de Barretos                                                                             | NA                                                                                                                                                          | Barretos SP 14784-400 Brazil                   |
| 2801              | Hospital A.C. Camargo - Fundação Antonio Prudente Rua Professor Antonio Prudente, 211 – Liberdade                                                           | NA                                                                                                                                                          | Sao Paulo SP 01509-900 Brazil                  |
| 2802              | Comitê de Ética em Pesquisa da Universidade de Passo Fundo                                                                                                  | Pró reitoria de pesquisa e pós graduação                                                                                                                    | Passo Fundo Rio Grande do Sul 99052-900 Brazil |
| 2804              | Comitê de Ética em Pesquisa da Universidade Regional do Noroeste do Estado do Rio Grande do Sul -Unijui                                                     | NA                                                                                                                                                          | Ijuí Rio Grande do Sul 98700-000 Brazil        |
| 2805              | Comitê de Ética em Pesquisa do Instituto Brasileiro de Controle do Câncer Av. Alcântara Machado, 2576 – Mooca Phone: (11) 3474-4227                         | Comitê de Ética em Pesquisa do Instituto Brasileiro de Controle do Câncer Av. Alcântara Machado, 2576 – Mooca Phone: (11) 3474-4227                         | São Paulo SP 03102-002 Brazil                  |
| 2807              | Comitê de Ética em Pesquisa do Centro de Referência da Saúde da Mulher-CRSM                                                                                 | Comitê de Ética em Pesquisa do Centro de Referência da Saúde da Mulher-CRSM                                                                                 | São Paulo SP 01317-010 Brazil                  |
| 2809              | Comitê de Ética em Pesquisa Envolvendo Seres Humanos- CEP/UEL LABESC - Laboratório Escola - Rodovia Celso Garcia Cid, Km 380 (PR445) - Campus Universitário | Comitê de Ética em Pesquisa Envolvendo Seres Humanos- CEP/UEL LABESC - Laboratório Escola - Rodovia Celso Garcia Cid, Km 380 (PR445) - Campus Universitário | Londrina PR 86057-970 Brazil                   |
| 2900              | UBC BCCA Research Ethics Board                                                                                                                              | Fairmont Medical Building                                                                                                                                   | Vancouver BC V5Z1H8 Canada                     |
| 2901              | IRB Services 372 Hollandview Trail, Suite 300 Aurora, Ontario                                                                                               | NA                                                                                                                                                          | Aurora Ontario L4G 0A5 Canada                  |
| 2902              | Health Research Ethics Board of Alberta                                                                                                                     | Cancer Committee                                                                                                                                            | Edmonton AB T5J 4A7 Canada                     |
| 2903              | OCREB (Ontario Cancer Research Ethics Board)                                                                                                                | MaRS Center, 661 University Ave, Suite 510                                                                                                                  | Toronto Ontario M5G 0A3 Canada                 |
| 2904              | Comité d'éthique de la recherche CHU de Québec - Université Laval                                                                                           | NA                                                                                                                                                          | Quebec QC G1L 3L5 Canada                       |
| 2907              | OCREB-Ontario Institute for Cancer Research MaRS Centre 661 University Avenue, Suite 510                                                                    | NA                                                                                                                                                          | Toronto Ontario M5G 0A3 Canada                 |

| <b>Center No.</b> | <b>Ethics Committee or Institutional Review Board</b>                              | <b>Department / Organization</b>                                                                           | <b>Address Country</b>                          |
|-------------------|------------------------------------------------------------------------------------|------------------------------------------------------------------------------------------------------------|-------------------------------------------------|
| 3300              | Medical Research Ethics Committee                                                  | University of Malaya Medical Centre                                                                        | Kuala Lumpur Wilayah Persekutuan 59100 Malaysia |
| 3301              | Medical Research & Ethics Committee                                                | Ministry of Health                                                                                         | Kuala Lumpur Wilayah Persekutuan 59000 Malaysia |
| 4000              | Commissie Medische Ethiek                                                          | UZ KU Leuven                                                                                               | Leuven NA 3000 Belgium                          |
| 4001              | Commissie voor Medische Ethiek                                                     | GZA Ziekenhuizen                                                                                           | Antwerpen NA 2018 Belgium                       |
| 4002              | Comité D' Ethique                                                                  | Institut Bordet                                                                                            | Bruxelles NA 1000 Belgium                       |
| 4004              | Comité D' Ethique                                                                  | Clinique et maternité Ste. Elisabeth                                                                       | Namur NA 5000 Belgium                           |
| 4100              | Central IRB/IEC - Central Institutional Review Board/ Independent Ethics Committee | NA                                                                                                         | Sofia Sofia Bulgaria                            |
| 4101              | Central IRB/IEC - Central Institutional Review Board/ Independent Ethics Committee | NA                                                                                                         | Sofia Sofia Bulgaria                            |
| 4104              | Central IRB/IEC - Central Institutional Review Board/ Independent Ethics Committee | NA                                                                                                         | Sofia Sofia Bulgaria                            |
| 4170              | CPP « Sud-Ouest et Outre-Mer III » - Bordeaux                                      | Groupe Hospitalier Pellegrin<br>Service de Pharmacologie<br>Clinique Bâtiment 1A<br>Place Amélie-Raba-Léon | Bordeaux NA 33076 France                        |
| 4171              | CPP « Sud-Ouest et Outre-Mer III » - Bordeaux                                      | Groupe Hospitalier Pellegrin<br>Service de Pharmacologie<br>Clinique Bâtiment 1A<br>Place Amélie-Raba-Léon | Bordeaux NA 33076 France                        |
| 4172              | CPP « Sud-Ouest et Outre-Mer III » - Bordeaux                                      | Groupe Hospitalier Pellegrin<br>Service de Pharmacologie<br>Clinique Bâtiment 1A<br>Place Amélie-Raba-Léon | Bordeaux NA 33076 France                        |
| 4173              | CPP « Sud-Ouest et Outre-Mer III » - Bordeaux                                      | Groupe Hospitalier Pellegrin<br>Service de Pharmacologie<br>Clinique Bâtiment 1A<br>Place Amélie-Raba-Léon | Bordeaux NA 33076 France                        |
| 4174              | CPP « Sud-Ouest et Outre-Mer III » - Bordeaux                                      | Groupe Hospitalier Pellegrin<br>Service de Pharmacologie<br>Clinique Bâtiment 1A<br>Place Amélie-Raba-Léon | Bordeaux NA 33076 France                        |
| 4176              | CPP « Sud-Ouest et Outre-Mer III » - Bordeaux                                      | Groupe Hospitalier Pellegrin<br>Service de Pharmacologie<br>Clinique Bâtiment 1A<br>Place Amélie-Raba-Léon | Bordeaux NA 33076 France                        |
| 4177              | CPP « Sud-Ouest et Outre-Mer III » - Bordeaux                                      | Groupe Hospitalier Pellegrin<br>Service de Pharmacologie<br>Clinique Bâtiment 1A<br>Place Amélie-Raba-Léon | Bordeaux NA 33076 France                        |

| <b>Center No.</b> | <b>Ethics Committee or Institutional Review Board</b>                                            | <b>Department / Organization</b>                                                                           | <b>Address Country</b>                                        |
|-------------------|--------------------------------------------------------------------------------------------------|------------------------------------------------------------------------------------------------------------|---------------------------------------------------------------|
| 4178              | CPP « Sud-Ouest et Outre-Mer III » - Bordeaux                                                    | Groupe Hospitalier Pellegrin<br>Service de Pharmacologie<br>Clinique Bâtiment 1A<br>Place Amélie-Raba-Léon | Bordeaux NA 33076<br>France                                   |
| 4200              | Ethikkommission bei der Medizinischen Fakultät der LMU München                                   | N/A                                                                                                        | München Bayern 80336<br>Germany                               |
| 4201              | Ethikkommission an der Medizinischen Fakultät der Universität Leipzig                            | NA                                                                                                         | Leipzig NA 04109<br>Germany                                   |
| 4203              | Ethik-Kommission der Medizinischen Fakultät der Christian-Albrechts-Universität zu Kiel          | NA                                                                                                         | Kiel NA 24105<br>Germany                                      |
| 4204              | Ärzttekammer Nordrhein Ethik-Kommission                                                          | NA                                                                                                         | Düsseldorf NA 40474<br>Germany                                |
| 4205              | Ethikkommission der LÄK Baden- Württemberg                                                       | NA                                                                                                         | Stuttgart NA 70597<br>Germany                                 |
| 4206              | Ethikkommission an der Technischen Universität Dresden                                           | NA                                                                                                         | Dresden NA 01307<br>Germany                                   |
| 4207              | Ethikkommission der Landesärztekammer Hessen                                                     | N/A                                                                                                        | Frankfurt Hessen 60488<br>Germany                             |
| 4211              | Ethikkommission der Ärztekammer Nordrhein                                                        | NA                                                                                                         | Düsseldorf NA 40474<br>Germany                                |
| 4212              | Ethikkommission der Universität Ulm                                                              | N/A                                                                                                        | Ulm Baden-Württemberg 89081<br>Germany                        |
| 4213              | Ethikkommission der Medizinischen Fakultät der Friedrich-Alexander-Universität Erlangen-Nürnberg | N/A                                                                                                        | Erlangen Bayern 91054<br>Germany                              |
| 4215              | Ethikkommission der LÄK Thüringen                                                                | NA                                                                                                         | Jena NA 07751<br>Germany                                      |
| 4216              | Landesärztekammer Baden-Württemberg Ethik-Kommission                                             | NA                                                                                                         | Stuttgart NA 70597<br>Germany                                 |
| 4300              | Scientific Council of Euromedica General Clinic of Thessaloniki                                  | Scientific Council                                                                                         | Thessaloniki Address: 11 Marias Kallas street 54645<br>Greece |
| 4301              | Scientific Council of the University General Hospital of Heraklion                               | Scientific Council                                                                                         | Heraklion Address: Voutes, Stavrakia 711 10<br>Greece         |
| 4400              | Medical Research Council                                                                         | Ethics committee for Clinical Pharmacology                                                                 | Budapest NA 1051<br>Hungary                                   |
| 4401              | Medical Research Council                                                                         | Ethics committee for Clinical Pharmacology                                                                 | Budapest NA 1051<br>Hungary                                   |
| 4402              | Medical Research Council                                                                         | Ethics committee for Clinical Pharmacology                                                                 | Budapest NA 1051<br>Hungary                                   |
| 4403              | Medical Research Council                                                                         | Ethics committee for Clinical Pharmacology                                                                 | Budapest NA 1051<br>Hungary                                   |
| 4405              | Medical Research Council                                                                         | Ethics committee for Clinical                                                                              | Budapest NA 1051                                              |

| <b>Center No.</b> | <b>Ethics Committee or Institutional Review Board</b>                                                                                    | <b>Department / Organization</b>                                         | <b>Address Country</b>                                                     |
|-------------------|------------------------------------------------------------------------------------------------------------------------------------------|--------------------------------------------------------------------------|----------------------------------------------------------------------------|
|                   |                                                                                                                                          | Pharmacology                                                             | Hungary                                                                    |
| 4406              | Medical Research Council                                                                                                                 | Ethics committee for Clinical Pharmacology                               | Budapest NA 1051<br>Hungary                                                |
| 4500              | Comitato etico centrale dell'irccs fondazione salvatore maugeri (irccs) di Pavia                                                         | Irccs fondazione salvatore maugeri (irccs) di pavia                      | Pavia pavia 27100<br>Italy                                                 |
| 4501              | Comitato etico indipendente dell'azienda ospedaliero-universitaria policlinico s.orsola-malpighi di bologna                              | NA                                                                       | Via albertoni pietro, 15-padiglione 3<br>Bologna<br>Bologna 40138<br>Italy |
| 4503              | Comitato etico catania 2 c/o azienda ospedaliera di rilievo nazionale e di alta specializzazione garibaldi (aornas garibaldi)            | NA                                                                       | Piazza santa maria gesù, 7<br>Catania<br>Catania 95125<br>Italy            |
| 4505              | Comitato Etico ASL Lecce                                                                                                                 | ASL- Lecce                                                               | Lecce Lecce 73100<br>Italy                                                 |
| 4506              | Comitato Etico dell'Istituto Nazionale Tumori Fondazione Pascale                                                                         | Via Mariano Semmola                                                      | Napoli NA 80131<br>Italy                                                   |
| 4507              | Comitato Etico Lazio 1                                                                                                                   | Az Ospedaliera San Camillo Forlanini – Circonvallazione Gianicolense, 87 | Roma RM 00152                                                              |
| 4509              | Comitato etico unico della provincia di ferrara c/o aou di ferrara                                                                       | NA                                                                       | Via aldo moro, 8<br>Ferrara<br>Ferrara 44124<br>Italy                      |
| 4511              | Comitato etico area cremona, mantova e lodi c/o ao di cremona                                                                            | NA                                                                       | Via della concordia, 1<br>Cremona<br>Cremona 26100<br>Italy                |
| 4512              | Comitato Etico Area Vasta Centro                                                                                                         | Area Vasta Centro-Toscana                                                | Firenze Firenze 50134<br>Italy                                             |
| 4513              | Comitato etico regionale della liguria c/o irccs aou san martino-ist istituto nazionale per la ricerca sul cancro                        | NA                                                                       | Largo rosanna benzi<br>Genova<br>Genova 16132<br>Italy                     |
| 4514              | Comitato Etico IRCCS Candiolo SP142 Km 3.95 10060 Candiolo (TO)                                                                          | NA                                                                       | Candiolo - torino to 10060<br>Italy                                        |
| 4517              | Comitato etico regionale (cer) delle marche c/o azienda ospedaliera universitaria ospedali riuniti umberto i-lancisi-gm salesi di ancona | NA                                                                       | Via conca<br>Ancona<br>Ancona 60126<br>Italy                               |
| 4518              | CEAS Umbria                                                                                                                              | Umbria                                                                   | Ellera di Corciano Perugia 06070<br>Italy                                  |
| 4519              | Comitato etico irst irccs avr                                                                                                            | NA                                                                       | Via pieromaroncelli, 40<br>meldola<br>forli-cesena 47014<br>Italy          |

| <b>Center No.</b> | <b>Ethics Committee or Institutional Review Board</b>                                                           | <b>Department / Organization</b>  | <b>Address Country</b>                                                               |
|-------------------|-----------------------------------------------------------------------------------------------------------------|-----------------------------------|--------------------------------------------------------------------------------------|
| 4522              | Comitato etico per le province di l'aquila e teramo. presidio ospedaliero l'aquila, loc.vetoio, coppito         | NA                                | L'aquila l'aquila 67100<br>Italy                                                     |
| 4523              | Comitato etico degli irccs istituto europeo di oncologia e centro cardiologico monzino                          | NA                                | Via giuseppe ripamonti, 435<br>Milano<br>Milano 20141<br>Italy                       |
| 4524              | Comitato etico regionale unico (ceru) c/o azienda ospedaliero-universitaria s.maria della misericordia di udine | NA                                | Piazzale s.maria della misericordia<br>Udine<br>Udine 33100<br>Italy                 |
| 4525              | Comitato Etico AreaVasta Nord Ovest                                                                             | AreaVasta Nord Ovest-Toscana      | Pisa Pisa 56126<br>Italy                                                             |
| 4526              | Comitato Etico università Federico II di Napoli                                                                 | Via Sergio Pansini, 5             | Napoli NA 80131<br>Italy                                                             |
| 4527              | Comitato Etico fondazione Policlinico Universitario Gemelli                                                     | Policlinico Gemelli- Roma         | Roma Roma 00168<br>Italy                                                             |
| 4528              | Comitato etico delle azienda sanitarie dell'umbria-segreteria scientifico-amministrativa del ceas umbria        | NA                                | Via della rivoluzione, 16 – ellera di Corciano<br>Corciano<br>Perugia 06073<br>Italy |
| 4601              | Niezależna Komisja Bioetyczna ds. Badań Naukowych przy Gdańskim Uniwersytecie Medycznym                         | NA                                | Gdańsk NA 80-210<br>Poland                                                           |
| 4602              | Niezależna Komisja Bioetyczna ds. Badań Naukowych przy Gdańskim Uniwersytecie Medycznym                         | NA                                | Gdańsk NA 80-210<br>Poland                                                           |
| 4700              | Comissão de Ética para a Investigação Clínica (CEIC)                                                            | N/A                               | Lisbon Lisbon 1749-004<br>Portugal                                                   |
| 4701              | Comissão de Ética para a Investigação Clínica (CEIC)                                                            | N/A                               | Lisbon Lisbon 1749-004<br>Portugal                                                   |
| 4702              | Comissão de Ética para a Investigação Clínica (CEIC)                                                            | N/A                               | Lisbon Lisbon 1749-004<br>Portugal                                                   |
| 4703              | Comissão de Ética para a Investigação Clínica (CEIC)                                                            | N/A                               | Lisbon Lisbon 1749-004<br>Portugal                                                   |
| 4704              | Comissão de Ética para a Investigação Clínica (CEIC)                                                            | N/A                               | Lisbon Lisbon 1749-004<br>Portugal                                                   |
| 4900              | Commission Cantonale d'éthique et de la Recherche (CCER)                                                        | Hôpitaux Universitaires de Genève | Genève GE 1207<br>Switzerland                                                        |
| 5000              | Washington University Human Research Protection Office                                                          | NA                                | Saint Louis MO 63110<br>United States                                                |
| 5002              | Office of the Human Research Protection Program (OHRPP)                                                         | NA                                | Los Angeles CA 90095<br>US                                                           |
| 5004              | MD Anderson Cancer Center Institutional Review Board                                                            | MD Anderson Cancer Center IRB     | Houston Houston 77030<br>United States                                               |
| 5005              | Quorum                                                                                                          | NA                                | Seattle WA 98101                                                                     |



| <b>Center No.</b> | <b>Ethics Committee or Institutional Review Board</b>                                                | <b>Department / Organization</b>                    | <b>Address Country</b>                                                      |
|-------------------|------------------------------------------------------------------------------------------------------|-----------------------------------------------------|-----------------------------------------------------------------------------|
|                   |                                                                                                      |                                                     | United States                                                               |
| 5006              | Quorum Review IRB                                                                                    | NA                                                  | Seattle WA 98101<br>United States                                           |
| 5010              | Western Institutional Review Board                                                                   | NA                                                  | 1019 39th Avenue SE Suite 120  <br>Puyallup WA 98374--2115<br>United States |
| 5011              | Western Institutional Review Board                                                                   | NA                                                  | Puyallup WA 98374<br>USA                                                    |
| 5013              | The Center For Cancer and Blood Disorders IRB                                                        | NA                                                  | Fort Worth Texas<br>USA                                                     |
| 5015              | Western Institutional Review Board                                                                   | NA                                                  | 1019 39th Avenue SE Suite 120  <br>Puyallup WA 98374--2115<br>United States |
| 5022              | Quorum Review IRB                                                                                    | NA                                                  | Seattle WA 98101<br>USA                                                     |
| 5024              | Quorum Review INC                                                                                    | NA                                                  | Seattle WA 98101<br>USA                                                     |
| 5025              | University of Miami Institutional review board                                                       | NA                                                  | Miami FL 33136<br>USA                                                       |
| 5027              | Dana-Farber Cancer Institute IRB                                                                     | NA                                                  | Valencia CA 91355<br>United States                                          |
| 5028              | IRBMED                                                                                               | NA                                                  | Bldg 520 Room 3214,2800 Plymouth Rd<br>Ann Arbor<br>MI 48109<br>USA         |
| 5030              | Memorial Healthcare System Institutional Review Board                                                | NA                                                  | Hollywood FL 33021<br>United States                                         |
| 5033              | Western Institutional Review Board                                                                   | NA                                                  | 1019 39th Avenue SE Suite 120<br>Puyallup WA 98374-2215<br>USA              |
| 5034              | BSD IRB, The University of Chicago Biomedical Sciences Division/University of Chicago Medical Centre | 5751 S. Woodlawn Ave,<br>McGiffert House, 2nd Floor | Chicago IL 60637<br>USA                                                     |
| 5040              | Quorum IRB                                                                                           | NA                                                  | Seattle WA 98101<br>USA                                                     |
| 5043              | Kaiser Permanente Hawaii Institutional Review Board                                                  | NA                                                  | 711 Kapiolani Blvd., Suite 110,<br>Honolulu HI 96813<br>USA                 |
| 5044              | BAMC Institutional Review Board                                                                      | NA                                                  | 3551 Roger Brook Drive, Ft Sam<br>Houston, TX 78234 TX 78234<br>USA         |
| 5045              | Quorum Review IRB                                                                                    | NA                                                  | Seattle WA 98101<br>USA                                                     |
| 5050              | Western Institutional Review Board (WIRB)                                                            | 1019 39th Avenue SE, Suite 120                      | Puyallup WA 98374-2115<br>USA                                               |
| 5061              | Johns Hopkins Medicine Institutional Review Board                                                    | NA                                                  | Baltimore MD 21205-1911<br>USA                                              |
| 5062              | Quorum Review IRB                                                                                    | NA                                                  | Seattle WA 98101<br>USA                                                     |
| 5063              | Quorum Review IRB                                                                                    | NA                                                  | Seattle WA 98101                                                            |

| <b>Center No.</b> | <b>Ethics Committee or Institutional Review Board</b>                                | <b>Department / Organization</b>                                                | <b>Address Country</b>                     |
|-------------------|--------------------------------------------------------------------------------------|---------------------------------------------------------------------------------|--------------------------------------------|
|                   |                                                                                      |                                                                                 | USA                                        |
| 5065              | Houston Methodist Research Institutional Review Board                                | NA                                                                              | Houston TX 77030<br>USA                    |
| 5066              | Penn State Milton S. Hershey Medical Center, Penn State College of Medicine          | Human Subject Protection Office                                                 | Hershey PA 17033<br>USA                    |
| 5067              | Western Institutional Review Board                                                   | NA                                                                              | Puyallup WA 98374<br>USA                   |
| 5068              | Western Institutional Review Board                                                   | NA                                                                              | 1019 39th Ave SE, Puyallup WA 98374<br>USA |
| 5073              | Duke University Health System IRB                                                    | Duke University Medical Center, St. 405, Box 2712                               | Durham NC 27705<br>USA                     |
| 5076              | San Antonio Institutional Review Board                                               | The University of Texas Health Science Center                                   | San Antonio TX 78229-3900<br>USA           |
| 5078              | Western Institutional Review board                                                   | NA                                                                              | Puyallup WA 98374-2115<br>USA              |
| 5084              | SCL Health-Front Range IRB                                                           | NA                                                                              | 1375 E. 19th Ave, Denver CO 80218<br>USA   |
| 5095              | Western Institutional Review Board                                                   | NA                                                                              | Puyallup WA 98374<br>USA                   |
| 5096              | WIRB                                                                                 | 1019 39th Ave SE Suite 120                                                      | Puyallup WA 98374<br>USA                   |
| 6000              | CEIC Hospital Clínico San Carlos<br>Doctor Martín Lagos, s/n.<br>Puerta G - 4ª Norte | Hospital Clínico San Carlos<br>Doctor Martín Lagos, s/n.<br>Puerta G - 4ª Norte | Madrid Madrid<br>Spain                     |
| 6001              | CEIC Hospital Clínico San Carlos<br>Doctor Martín Lagos, s/n.<br>Puerta G - 4ª Norte | Hospital Clínico San Carlos<br>Doctor Martín Lagos, s/n.<br>Puerta G - 4ª Norte | Madrid Madrid<br>Spain                     |
| 6002              | CEIC Hospital Clínico San Carlos<br>Doctor Martín Lagos, s/n.<br>Puerta G - 4ª Norte | Hospital Clínico San Carlos<br>Doctor Martín Lagos, s/n.<br>Puerta G - 4ª Norte | Madrid Madrid<br>Spain                     |
| 6003              | CEIC Hospital Clínico San Carlos<br>Doctor Martín Lagos, s/n.<br>Puerta G - 4ª Norte | Hospital Clínico San Carlos<br>Doctor Martín Lagos, s/n.<br>Puerta G - 4ª Norte | Madrid Madrid<br>Spain                     |
| 6004              | CEIC Hospital Clínico San Carlos<br>Doctor Martín Lagos, s/n.<br>Puerta G - 4ª Norte | Hospital Clínico San Carlos<br>Doctor Martín Lagos, s/n.<br>Puerta G - 4ª Norte | Madrid Madrid<br>Spain                     |
| 6005              | CEIC Hospital Clínico San Carlos<br>Doctor Martín Lagos, s/n.<br>Puerta G - 4ª Norte | Hospital Clínico San Carlos<br>Doctor Martín Lagos, s/n.<br>Puerta G - 4ª Norte | Madrid Madrid<br>Spain                     |
| 6006              | CEIC Hospital Clínico San Carlos<br>Doctor Martín Lagos, s/n.<br>Puerta G - 4ª Norte | Hospital Clínico San Carlos<br>Doctor Martín Lagos, s/n.<br>Puerta G - 4ª Norte | Madrid Madrid<br>Spain                     |
| 6007              | CEIC Hospital Clínico San Carlos                                                     | Hospital Clínico San Carlos<br>Doctor Martín Lagos, s/n.                        | Madrid Madrid<br>Spain                     |

| <b>Center No.</b> | <b>Ethics Committee or Institutional Review Board</b>                                | <b>Department / Organization</b>                                                | <b>Address Country</b> |
|-------------------|--------------------------------------------------------------------------------------|---------------------------------------------------------------------------------|------------------------|
|                   | Doctor Martín Lagos, s/n.<br>Puerta G - 4ª Norte                                     | Puerta G - 4ª Norte                                                             |                        |
| 6008              | CEIC Hospital Clínico San Carlos<br>Doctor Martín Lagos, s/n.<br>Puerta G - 4ª Norte | Hospital Clínico San Carlos<br>Doctor Martín Lagos, s/n.<br>Puerta G - 4ª Norte | Madrid Madrid<br>Spain |
| 6009              | CEIC Hospital Clínico San Carlos<br>Doctor Martín Lagos, s/n.<br>Puerta G - 4ª Norte | Hospital Clínico San Carlos<br>Doctor Martín Lagos, s/n.<br>Puerta G - 4ª Norte | Madrid Madrid<br>Spain |
| 6010              | CEIC Hospital Clínico San Carlos<br>Doctor Martín Lagos, s/n.<br>Puerta G - 4ª Norte | Hospital Clínico San Carlos<br>Doctor Martín Lagos, s/n.<br>Puerta G - 4ª Norte | Madrid Madrid<br>Spain |
| 6011              | CEIC Hospital Clínico San Carlos<br>Doctor Martín Lagos, s/n.<br>Puerta G - 4ª Norte | Hospital Clínico San Carlos<br>Doctor Martín Lagos, s/n.<br>Puerta G - 4ª Norte | Madrid Madrid<br>Spain |
| 6013              | CEIC Hospital Clínico San Carlos<br>Doctor Martín Lagos, s/n.<br>Puerta G - 4ª Norte | Hospital Clínico San Carlos<br>Doctor Martín Lagos, s/n.<br>Puerta G - 4ª Norte | Madrid Madrid<br>Spain |
| 6014              | CEIC Hospital Clínico San Carlos<br>Doctor Martín Lagos, s/n.<br>Puerta G - 4ª Norte | Hospital Clínico San Carlos<br>Doctor Martín Lagos, s/n.<br>Puerta G - 4ª Norte | Madrid Madrid<br>Spain |
| 6015              | CEIC Hospital Clínico San Carlos<br>Doctor Martín Lagos, s/n.<br>Puerta G - 4ª Norte | Hospital Clínico San Carlos<br>Doctor Martín Lagos, s/n.<br>Puerta G - 4ª Norte | Madrid Madrid<br>Spain |
| 6016              | CEIC Hospital Clínico San Carlos<br>Doctor Martín Lagos, s/n.<br>Puerta G - 4ª Norte | Hospital Clínico San Carlos<br>Doctor Martín Lagos, s/n.<br>Puerta G - 4ª Norte | Madrid Madrid<br>Spain |
| 6019              | CEIC Hospital Clínico San Carlos<br>Doctor Martín Lagos, s/n.<br>Puerta G - 4ª Norte | Hospital Clínico San Carlos<br>Doctor Martín Lagos, s/n.<br>Puerta G - 4ª Norte | Madrid Madrid<br>Spain |

## 2 Representative written information for patient and sample consent forms

**Table 2-1 Sample informed consent(s) used during study conduct**

|                                                             | <b>Associated protocol or amendment</b> | <b>Protocol effective date</b> |
|-------------------------------------------------------------|-----------------------------------------|--------------------------------|
| <a href="#">Model informed consent (global)</a>             | Original protocol                       | 30-Jul-2014                    |
| <a href="#">Model informed consent (global)</a>             | Original protocol                       | 30-Jul-2014                    |
| <a href="#">Model informed consent (global) Amendment 1</a> | Amendment Protocol 1                    | 28-Apr-2015                    |
| <a href="#">Model informed consent (global) Amendment 2</a> | Amendment Protocol 2                    | 17-Feb-2016                    |
| <a href="#">Model informed consent (global) Amendment 3</a> | Amendment Protocol 3                    | 24-Jun-2016                    |
| <a href="#">Model informed consent (global) Amendment 4</a> | Amendment Protocol 4                    | 24-Feb-2017                    |
